# Detection and Removal of Hyper-synchronous Artifacts in Massively Parallel Spike Recordings

Jonas Oberste-Frielinghaus<sup>1,2,5\*</sup>, Aitor Morales-Gregorio<sup>1,5</sup>, Simon Essink<sup>1,2</sup>,  
Alexander Kleinjohann<sup>1,2</sup>, Sonja Grün<sup>1,3,4</sup>, Junji Ito<sup>1</sup>

March 26, 2024

<sup>1</sup>Institute for Advanced Simulation (IAS-6), Jülich Research Centre, Jülich, Germany

<sup>2</sup>RWTH Aachen University, Aachen, Germany

<sup>3</sup>JARA-Institute Brain Structure-Function Relationships (INM-10), Jülich Research Centre, Jülich, Germany

<sup>4</sup>Theoretical Systems Neurobiology, RWTH Aachen University, Aachen, Germany

<sup>5</sup>These authors contributed equally

\*Correspondence: [j.oberste-frielinghaus@fz-juelich.de](mailto:j.oberste-frielinghaus@fz-juelich.de)

## Abstract

Current electrophysiology experiments often involve massively parallel recordings of neuronal activity using multi-electrode arrays. While researchers have been aware of artifacts arising from electric cross-talk between channels in setups for such recordings, systematic and quantitative assessment of the effects of those artifacts on the data quality has never been reported. Here we present, based on examination of electrophysiology recordings from multiple laboratories, that multi-electrode recordings of spiking activity commonly contain extremely precise (at the data sampling resolution) spike coincidences far above the chance level. We derive, through modeling of the electric cross-talk, a systematic relation between the amount of such hyper-synchronous events (HSEs) in channel pairs and the correlation between the raw signals of those channels in the multi-unit activity frequency range (250-7500 Hz). Based on that relation, we propose a method to identify and exclude specific channels to remove artifactual HSEs from the data. We further demonstrate that the artifactual HSEs can severely affect various types of analyses on spiking train data. Taken together, our results warn researchers to pay considerable attention to the presence of HSEs in spike train data and to make efforts to remove the artifacts from the data to avoid false results.

## 1 Introduction

2 Modern electrophysiological experiments often use multi-electrodes, such as Utah arrays (Blackrock Microsystems,  
3 Salt Lake City, UT, USA) (Hatsopoulos et al., 1998; de Haan et al., 2018; Chen et al., 2022) and Neuropixels  
4 probes (Cambridge NeuroTech, Cambridge UK) (Jun et al., 2017), to record neuronal activity at multiple sites  
5 simultaneously. These recordings are known to be very sensitive to various sources of noise (Rey et al., 2015;  
6 Harris et al., 2016), which need to be mitigated to enable reliable and robust data analysis. Signal artifacts in  
7 neural recordings occur from both internal (heartbeats, eye movements, chewing etc.) and external (electric  
8 grid interference, loud noises etc.) sources (Fabietti et al., 2020). These sources are of non-neural origin, and  
9 can often be distinguished from neural activity owing to their particular frequencies and distinct waveforms.  
10 Common removal methods are based on independent component analysis (Bell & Sejnowski, 1995; Rong &  
11 Contreras-Vidal, 2006; Delorme et al., 2007), canonical correlation analysis (Hotelling, 1936; Wim De Clercq et al.,  
12 2006), wavelet methods, or certain combinations thereof. These are mostly applied to electroencephalogram (EEG)  
13 (Wim De Clercq et al., 2006; Delorme et al., 2007; Shackman et al., 2009; Barban et al., 2021; Mumtaz et al.,

14 2021) and magnetoencephalogram (Rong & Contreras-Vidal, 2006) data, and to a lesser extent to extracellular  
15 electrophysiology (Ludwig et al., 2009; Islam et al., 2014; Fabietti et al., 2020).

16 Besides these common noise sources, capacitive coupling between shanks or cables can cause cross-talk between  
17 different channels (Nelson et al., 2017), leading to a mixing of neural signals that can persist even after spike  
18 sorting (Torre et al., 2016). Cross-talk is a well-known problem in EEG (Nagaoka et al., 1992) and electromyogram  
19 (Koh & Grabiner (1993); Kilner et al. (2002); Farina et al. (2004)) data recording systems. Yet, to the best of  
20 our knowledge, only a few studies have focused on cross-talk in electrophysiology systems (Musial et al., 2002;  
21 Nelson et al., 2017; Pérez-Prieto & Delgado-Restituto, 2021). One approach to avoid cross-talk in these systems  
22 is through hardware implementations, like improving the isolation and design of the circuits (Blot & Barbour,  
23 2014; Nelson et al., 2017; Pérez-Prieto & Delgado-Restituto, 2021; Perez-Prieto et al., 2021). However, most  
24 neuroscientists do not design their own custom hardware and thus the effects of cross-talk have to be mitigated  
25 with post-hoc methods.

26 One artifact linked to cross-talk is extremely precise (at the data sampling resolution, e.g.  $\frac{1}{30}$  ms) spike  
27 synchrony (Yu et al., 2009; Torre et al., 2016; Dehnen et al., 2021; Chen et al., 2022). Spiking activity is known to  
28 be coordinated on the timescales of a few milliseconds (König et al., 1995; Riehle et al., 1997; Butts et al., 2007;  
29 Grün, 2009), but no observation of sub-millisecond coordination has been reported, nor are there any known  
30 mechanisms that enable sub-millisecond synchronization. Furthermore, the separation between electrodes in those  
31 studies was  $\geq 400 \mu\text{m}$ , well beyond the spatial reach of extracellular electrodes (Henze et al., 2000), denying the  
32 possibility that the apparent sub-millisecond synchronization is merely an identical spike recorded by multiple  
33 electrodes. Therefore, these hyper-synchronous events were considered artifacts, which we name here *synchrofacts*  
34 (short for synchronous artifacts).

35 Some studies remove suspicious spikes from further analysis either during the spike sorting process (Musial  
36 et al., 2002; Dann et al., 2016) or post-hoc (Torre et al., 2016; Dehnen et al., 2021). Other studies remove entire  
37 channels or neurons instead (Churchland et al., 2006; Yu et al., 2009; Snyder et al., 2021; Chen et al., 2022;  
38 Semedo et al., 2022; Morales-Gregorio et al., 2023). However, most removal methods are relatively complex,  
39 computationally expensive, and might require manual verification of the results.

40 To overcome the limitations of the above mentioned methods, we here show that cross-talking channels can  
41 be detected from both the raw signal cross-correlation and the degree of spike coincidence. Our detection method  
42 is tested on two extracellular electrophysiology data sets from two different experimental laboratories (de Haan  
43 et al., 2018; Chen et al., 2022). A theoretical model confirms that the experimental observations are consistent  
44 with what is expected from cross-talk between recording channels. Furthermore, we propose and evaluate several  
45 methods to remove synchrofacts based on our metrics. Finally, we demonstrate that the presence of synchrofacts  
46 can radically affect analysis results: on a) estimation of neuronal tuning curves and on b) Unitary Event analysis  
47 (Grün et al., 1999, 2002a,b; Grün, 2009) for detection of excess spike synchrony. The application examples  
48 highlight the need for the detection and removal of synchrofacts. All in all, our methods construe a novel and  
49 simple approach to synchrofact removal that can be applied to any multi-electrode recording system to ensure  
50 cleaner and more reliable data.

## 51 Results

### 52 Synchronous spike events are ubiquitous in multi-electrode systems

53 To demonstrate how synchrofacts appear in massively parallel spike train data, we inspect two data sets from two  
54 different laboratories and monkeys (Figure 1a). In the dot-display of the simultaneously recorded spike trains  
55 (Figure 1b, top), we notice events where many neurons exhibit spikes simultaneously (highlighted in gray). To  
56 examine the temporal scale of these events, we compute the population spike time histograms with different bin  
57 sizes (Figure 1b, bottom). At the resolutions of 1 ms and  $\frac{1}{30}$  ms, we find some bins with outstandingly high spike

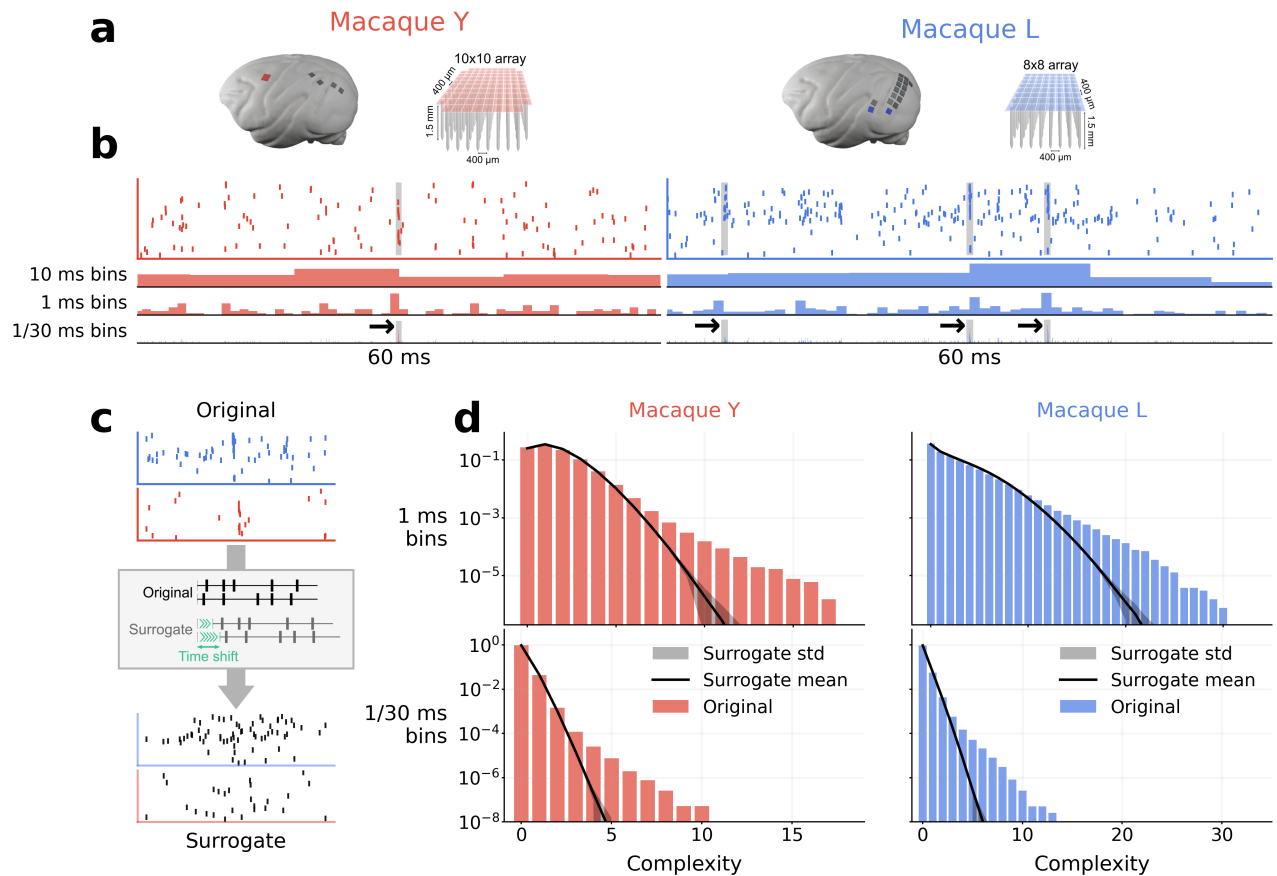

Figure 1: Observation of hyper-synchronous event (HSEs). (a) Electrode arrays and implantation sites for the two macaques, macaque Y: 6x6 electrode arrays in V1, V2, DP, 7A and 10x10 in M1/PMd (we focus here only on the 10x10 array); macaque L: 14 8x8 arrays in V1 and two in V4 (focus here on an array pair with one in V1 and one in V4). The arrays focused on are colored. (b) Dot display (top) and population histograms with different bin sizes (bottom) for a 60 ms long data slice. HSEs are highlighted with gray. (c) Illustration of the surrogate generation method. Original spike trains are shifted against each other by a random amount of time. (d) Complexity distribution of the original data (colored bars), and the mean and standard deviation (line and shade, respectively) for the complexity distribution of the respective surrogates. Top: 1 ms bin size; bottom:  $\frac{1}{30}$  ms bin size.

counts, not visible at the resolution of 10 ms. Whereas neurons can coordinate their activity with millisecond precision (König et al., 1995; Riehle et al., 1997; Butts et al., 2007), to the best of our knowledge, no neural mechanism has been reported to produce synchronization within  $\frac{1}{30}$  ms. We term these extremely precise spike coincidences as hyper-synchronous events (HSEs).

We further quantify the HSEs by their complexity (i.e., number of involved neurons) (Grün et al., 2008) and compare the obtained complexities to those expected by chance using a surrogate method (Stella et al., 2022) (Figure 1c; see STAR Methods for details). Figure 1d shows the distributions of complexity values from the original and the surrogate data, for two different bin sizes (1 ms and  $\frac{1}{30}$  ms). For both bin sizes, the original data contains much more events with high complexities than the surrogate data. Thus, HSEs occur by chance much less than what we observe in the experimental data. Considering that the coordination of spike times on the timescale of  $\frac{1}{30}$  ms is very unlikely, we conclude that many of the HSEs in the experimental data are artifacts, which we name synchrofacts.

We find synchrofacts in two separate data sets originating from two different laboratories, recorded in two different cortical areas of different monkeys. Therefore we suspect that synchrofacts are common across recordings of the same type. While both data sets were recorded with Blackrock recording systems, it has been reported

73 that synchrofacts also occur in other recording systems, e.g. in Neuropixel recordings (Jain et al., 2022). Taken  
74 together, our observations and previous reports highlight the ubiquity of synchrofacts.

75 One might think that the data can be cleaned by simply removing all HSEs. However, that is not an  
76 appropriate solution to get rid of synchrofacts, since this also removes many genuine neuronal spikes and neural  
77 synchrony. One can demonstrate this by removing all spikes in the bins with complexity of two or larger at  
78  $\frac{1}{30}$  ms resolution, and then calculating the complexity distribution, to compare it to the surrogate complexity  
79 distribution. The surrogate distribution obtained in this way contains complexities of two or higher that occur by  
80 chance. However, the original distribution totally lacks complexities higher than 2, and hence it differs vastly  
81 from the surrogate distribution (see Supplementary Figure S1). Thus, removing all HSEs alters the statistic  
82 properties of the spike trains significantly, which can lead to false results regarding fine temporal correlations.

83 To summarize, HSEs in massively parallel spike trains commonly contain synchrofacts, which are artificial  
84 spike coincidence events on a timescale of the data sampling frequency. They can only be spotted when analyzing  
85 the data on very fine timescales and show themselves as an excess of HSEs. Since HSEs contain not only  
86 synchrofacts but also genuine neuronal synchrony (as well as chance coincidences), removing all HSEs for cleaning  
87 the data is not a proper approach. Hence, we aim at selectively removing synchrofacts from the data, and to this  
88 end, we need to discriminate synchrofacts from chance coincidences of real spikes.

## 89 Synchronous spike events with nearly identical raw signals are not of neural origin

90 Following the observations in the previous section, we now take a deeper look into the HSEs for features  
91 discriminating synchrofacts from chance spike coincidences. Whereas an HSE with a very high complexity is  
92 likely to be a synchrofact, we cannot rule out the possibility that it is a real spike synchrony. In fact, there is no  
93 way of discriminating between them on the description level of spikes. Thus, seeking for additional information to  
94 spot synchrofacts, we inspect the raw signals from which the spike events are extracted.

95 The spike extraction was done by thresholding the band-pass filtered raw signals in the frequency range of  
96 250 Hz – 7500 Hz (see [Signal processing and threshold crossings](#) in [STAR Methods](#) for details). For simplicity,  
97 we henceforth refer to the band-pass filtered raw signal merely as raw signal, unless noted otherwise. Figure 2a  
98 shows the raw signals of multiple channels around the timing of one HSE. We observe highly similar spike-like  
99 waveforms in multiple channels simultaneously, but with different amplitudes. Furthermore, the ongoing signal  
100 fluctuations before and after the HSE appear to be correlated across these channels. The electrodes of these  
101 channels are not necessarily in close spatial proximity, as shown in Figure 2b. We measure the distances between  
102 the electrodes of channels participating in each and every HSEs with high complexities, and observe that the high  
103 complexity HSEs often involve electrodes that are far apart, up to several millimeters (Figure 2c). In particular,  
104 in the case of macaque L, HSEs appear even across the two arrays located on opposite banks of the lunate sulcus.

105 To summarize, we have observed i) sub-millisecond synchronization of spikes across channels, ii) the nearly  
106 identical waveforms of those spikes, iii) the visible correlation between raw signals, and iv) the large distance  
107 between the participating electrodes. Taken together, these observations strongly suggest that many of these  
108 events are artifacts due to electric cross-talk between channels, rather than multiple electrodes recording the  
109 same neuron or some novel form of fast neuronal synchronization.

## 110 Cross-correlation and hyper-synchronous events can detect synchrofacts

111 An electric cross-talk between a channel pair is expected to increase the Pearson correlation coefficient between  
112 the raw signals of these channels. Figure 3a shows the raw signal correlation coefficient  $c_{i,j}$  between channels  $i$   
113 and  $j$  (see [Cross-correlation of high-pass filtered raw signals](#) in [STAR Methods](#) for details) for all channel pairs  
114 in the two data sets in a matrix form (only for  $i \neq j$ ), and Figure 3b the distribution of the  $c_{i,j}$  values in the  
115 matrix. The coefficients are mostly larger than zero, i.e., the raw signals are generally positively correlated. The  
116 coefficient values vary strongly across channel pairs, with some pairs showing quite strong correlation, in both

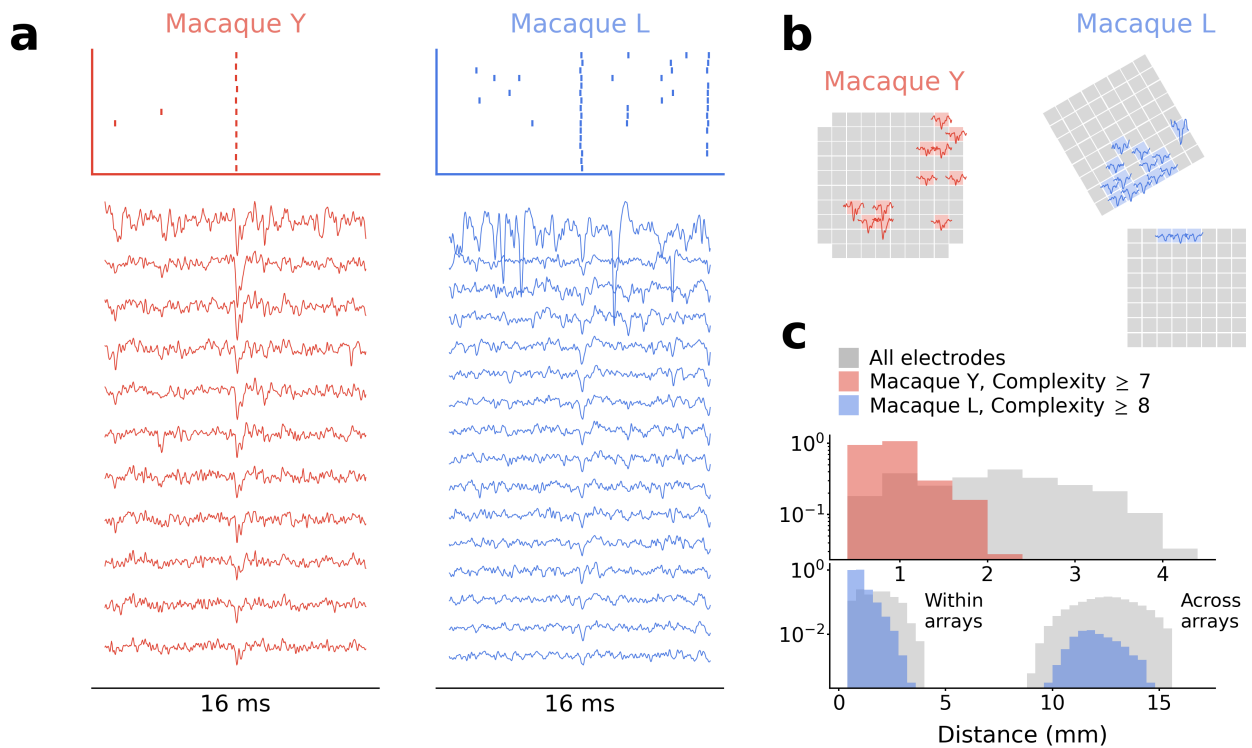

Figure 2: HSEs in relation to the raw signals, for macaque Y (red) and L (blue). (a) Dot display (top) centered around a single HSE and the corresponding band-pass filtered (250 Hz - 7500 Hz) raw signals of the channels participating in the HSE. Spike-like excursions are aligned on the HSE. (b) Positions of the electrodes on the respective array for the raw signal channels participating in the HSE in (a). The trace of the spike-like excursion in each channel is shown at the corresponding position. (c) Distances between the electrodes involved in all HSEs with high complexity, selected based on the surrogate analysis from Figure 1. For reference, the distance distribution between all possible electrode pairs is shown in gray.

117 recording setups from different laboratories.

118 There may be multiple possible origins for such strong correlations, ranging from damages on the electrodes  
119 to electric shortcuts between channels due to various reasons, e.g., crossing of the implanted cables below the  
120 skull, dirt in the headstage connector, interference between the cables connected to the amplifier, etc. (Yu et al.,  
121 2009). As shown in Figure 2b and c, the artifacts are not limited to spatially proximal channels but extend over  
122 the whole array or even across arrays, indicating that a deficit in a local group of channels cannot be the primary  
123 reason for these correlations. Another possibility is a local deficit on the headstage connector, but this is also  
124 denied by examining the spatial extent of correlated channels mapped on the connector (see Macaque L data in  
125 Supplementary Figure S2). Thus, no single reason can explain the observed correlations, but rather there would  
126 be multiple causes residing on different stages of the setup. Eliminating all possible causes from the setup is  
127 practically not feasible, and hence we cannot avoid having such correlations in the data.

128 Excluding the channels with strong correlations from the analysis would be easy, if their correlation coefficients  
129 were distinctly different from the other channels. However, the distribution of the correlation coefficient values  
130 typically shows a smooth decay towards high values (Figure 3b), indicating no clear critical correlation coefficient  
131 value above which the respective channel pairs are considered to be problematic.

132 To find an appropriate value for such a critical correlation, we examine the relation between the raw signal  
133 correlation  $c_{i,j}$  and the spike coincidences in the respective raw signals. For channel pairs with a large  $c_{i,j}$  value,  
134 their raw signals must be similar to each other. Hence, if one channel of such a pair had spike-like waveforms, the  
135 other channel should also have those at the same time. This leads to the expectation that a channel pair with a  
136 larger  $c_{i,j}$  should show more synchrofacts. To confirm this, we first count, for each channel pair, the number  
137 of HSEs containing spikes from that pair. We then define the HSE index  $I_{i,j}$  of channel  $i$  and  $j$  as the ratio of  
138 the obtained HSE count to the spike counts of these two channels (see **Measure of spike synchrony in STAR**  
139 **Methods** for the formula). Figure 3c shows the  $I_{i,j}$  values obtained from the two data sets in a matrix form  
140 (only for  $i \neq j$ ), and Figure 3d the distribution of those values in the matrix. We find  $I_{i,j}$  values ranging from  
141 zero to 0.5, while the value expected from an independent pair of spike trains is of order of magnitude  $10^{-3}$  (see  
142 Supplementary Figure S3).

143 We then plot  $I_{i,j}$  against the correlation coefficients  $c_{ij}$  to look for a systematic relation between them  
144 (Figure 3e). We find that a majority of channel pairs have HSE index values close to zero, meaning that hardly  
145 any spikes are shared by these pairs. Especially the channel pairs with low correlation coefficients  $c_{i,j}$  such as  
146  $< 0.4$  have very low HSE index values. As the correlation  $c_{i,j}$  gets larger than 0.4, the HSE index value rapidly  
147 increases, indicating a critical correlation beyond which spikes becomes very likely to be detected in both channels.  
148 Note that an HSE index larger than zero does not immediately indicate synchrofacts. As shown in (Figure 1d), a  
149 certain amount of HSEs can be explained by chance. However, as we mentioned before, the HSE index expected  
150 from independent spike trains is very small, on the order of  $10^{-3}$ . Hence, an HSE index excessively greater than  
151 this strongly indicates presence of synchrofacts.

## 152 **Cross-talk model explains the emergence of synchrofacts**

153 To understand the origin of the relation between the raw signal correlation and the HSE index, here we present  
154 a simple model of cross-talk between channels (see **Cross-talk model in STAR Methods** for details). This  
155 model enables us to derive an analytic expression of the relation, which is in agreement with our experimental  
156 observations (Figure 3e).

157 Our model assumes two Gaussian white noise (mean 0, variance  $\sigma^2$ ) time series  $x_1$  and  $x_2$  as the cross-talk-free  
158 “ground truth” signals. We model the cross-talk as a linear mixing of these two signals (Figure 4a), such that the  
159 measured signals  $s_1$  and  $s_2$  of channel 1 and 2, respectively, are:

$$\begin{aligned} s_1 &= x_1 + \alpha x_2 \\ s_2 &= x_2 + \alpha x_1, \end{aligned}$$

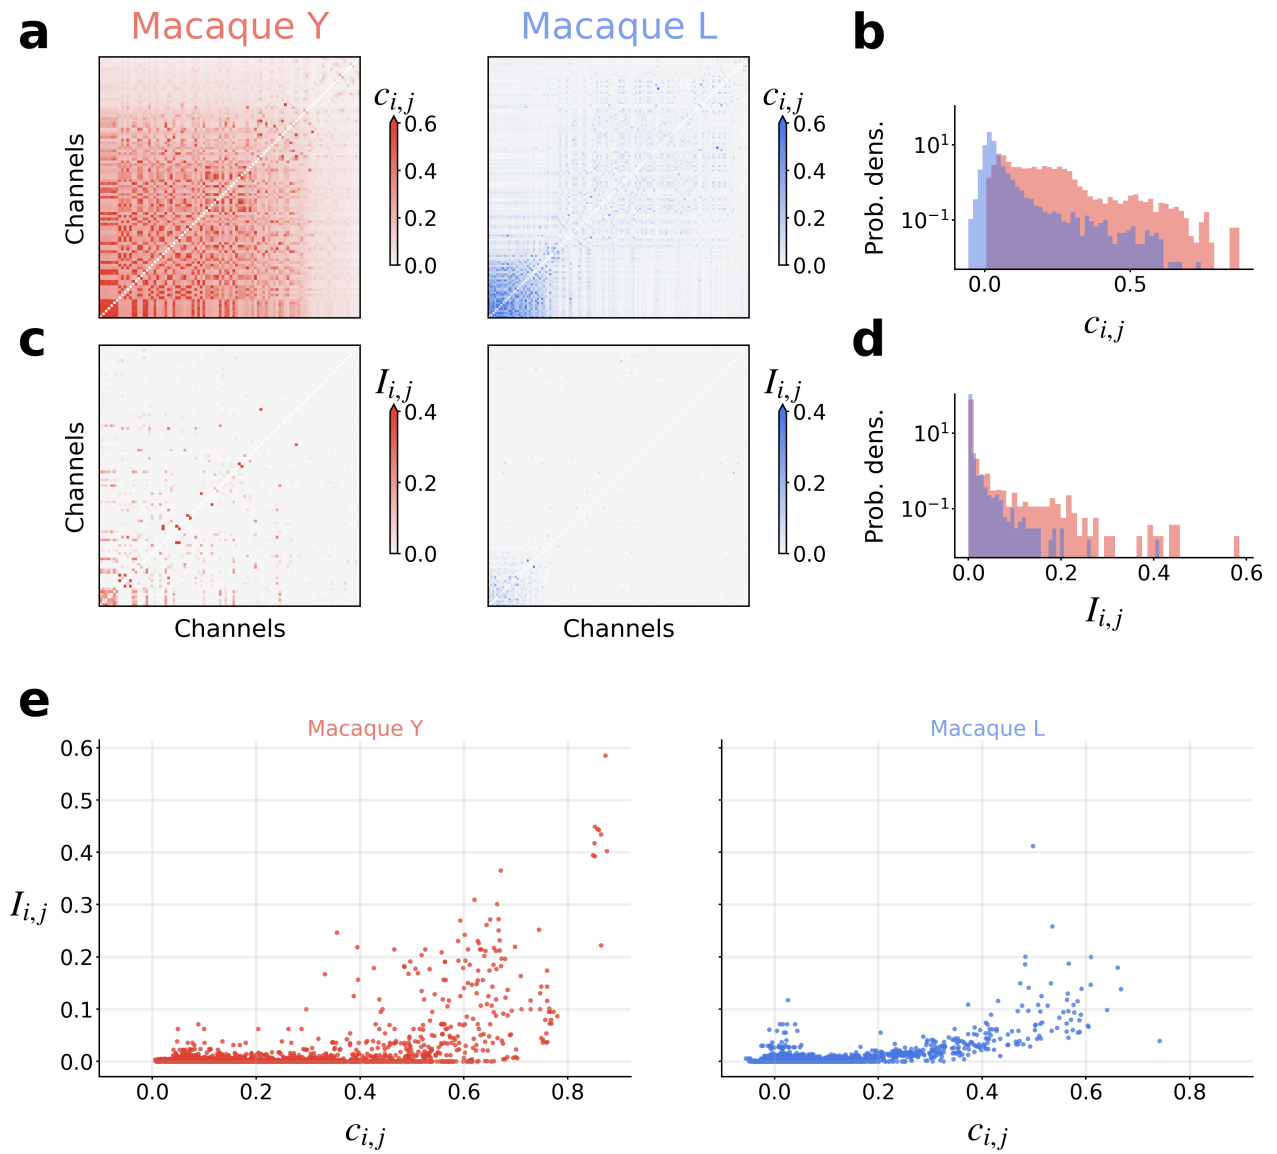

Figure 3: Relation of pairwise raw signal correlations to respective pairwise occurrences of HSEs. (a) Pairwise correlation coefficients  $c_{i,j}$  of the raw signals. Data are shown in matrix form; the channels are sorted by largest maximum correlation. (b) Distribution of the  $c_{i,j}$  values that appear in the matrix shown in (a). (c) HSE index  $I_{i,j}$  for all channel pairs shown in a channel-by-channel matrix form. The channels are sorted in the same order as in (a). (d) Distribution of the  $I_{i,j}$  values that appear in the matrix shown in (c). (e) Scatter plot of the raw signal correlation coefficient  $c_{i,j}$  against HSE index  $I_{i,j}$  of the corresponding channel pair. Each dot represents one channel pair.

160 where  $0 \leq \alpha \leq 1$  is the strength of the cross-talk:  $s_1$  and  $s_2$  are identical with  $\alpha = 1$ , and independent with  $\alpha = 0$ .  
161 The Pearson correlation coefficient  $c_{1,2}$  between  $s_1$  and  $s_2$  can be written in terms of  $\alpha$  as (see [Cross-talk model](#)  
162 in [STAR Methods](#) for derivation):

$$c_{1,2} = \frac{2\alpha}{1 + \alpha^2}. \quad (1)$$

163 Thus the correlation  $c_{1,2}$  increases nonlinearly with the cross-talk strength  $\alpha$  (see [Figure 4b](#)).

164 For the derivation of the HSE index, we need to introduce spikes to the signals. We model spikes by subtracting  
165 a value  $A_i$ , representing the spike amplitude, from the ground truth signal  $x_i$  at random time points ( $i \in \{1,2\}$ ).  
166 We parameterize  $A_i$  as  $A_i = \sigma r_i^{\text{SN}}$ , where  $r_i^{\text{SN}}$  is the signal-to-noise ratio of the spike waveform in  $x_i$ . Spikes are  
167 then extracted from the measured signals  $s_1$  and  $s_2$  by thresholding, as commonly done for experimental data.  
168 We set the threshold for  $s_i$  at  $-m\sigma_{s_i}$ , where  $\sigma_{s_i} = \sqrt{1 + \alpha^2}\sigma$  is the standard deviation of  $s_i$  and  $m$  is a multiplier  
169 ([Quiroga et al., 2004](#)). The expected numbers  $n_1$  and  $n_2$  of spikes detected in  $s_1$  and  $s_2$  are:

$$\begin{aligned} n_1 &= p_{1,1}(\alpha, r_1^{\text{SN}}, m) N_1 + p_{1,2}(\alpha, r_2^{\text{SN}}, m) N_2 \\ n_2 &= p_{2,1}(\alpha, r_1^{\text{SN}}, m) N_1 + p_{2,2}(\alpha, r_2^{\text{SN}}, m) N_2, \end{aligned}$$

170 where  $N_1$  and  $N_2$  are the number of spikes introduced in  $x_1$  and  $x_2$ , and  $p_{ij}$  are the probabilities that a spike  
171 from  $x_i$  is detected in  $s_j$ , see [Cross-talk model](#) in [STAR Methods](#) for more details.

172 The spikes transferred across channels by the cross-talk are detected in both channels, so the sum of the  
173 numbers of such spikes, i.e.,  $n_{1,2} = p_{1,2}N_2 + p_{2,1}N_1$  represents the number of synchrofacts in this pair of channels.  
174 We can now calculate the HSE index as  $I_{1,2} = n_{1,2}/\min(n_1, n_2)$  (see [Cross-talk model](#) in [STAR Methods](#) for  
175 detailed derivations).

176 Through the dependence of  $p_{i,j}$  on the cross-talk strength  $\alpha$ , the HSE index  $I_{1,2}$  is dependent on  $\alpha$  and thereby  
177 the correlation coefficient  $c_{1,2}$  ([Figure 4c](#)). Interestingly, no synchrofacts are observed in the model for  $\alpha < 0.2$  or  
178  $c_{1,2} < 0.4$ , suggesting that some degree of cross-talk might be tolerable in recording systems. However, for higher  
179  $\alpha$  or  $c_{1,2}$ , the HSE index rapidly increases in the form of a sigmoid, depending on the signal-to-noise ratio  $r^{\text{SN}}$ .

180 So far we have grouped spikes in one channel into a single class, i.e., spikes that originate from different ground  
181 truth signals (and therefore from different neurons) were not discriminated. In analyses of real spike train data,  
182 however, researchers are often interested in examining properties of the spiking activity of a single individual  
183 neuron, i.e., single unit activity (SUA). SUA spikes are sorted out from a spike train in a single channel, based on  
184 the waveforms of individual spikes. The original spike train before the sorting potentially contains spikes from  
185 multiple different neurons, termed multi-unit activity (MUA). In our analyses so far, the HSE index has been  
186 computed based on the MUA spikes of a pair of channels. We can instead consider the HSE index between a pair  
187 of individual SUAs, in the same manner as for the MUAs.

188 Let us examine how the HSE index for SUA pairs differs from that for MUA pairs, for the case shown in  
189 [Figure 4a](#). Here only one SUA (blue spikes) is detected in channel 1, while in channel 2 two SUAs (blue and  
190 orange spikes) could be detected, if the spike waveforms differed distinctly enough for successful spike sorting.  
191 Here we assume that these spikes are correctly sorted, and consider the HSE index between SUA11 and SUA21  
192 shown in [Figure 4a](#), and between SUA11 and SUA22 (note that the HSE index between SUA21 and SUA22 is  
193 zero, since there can be no HSEs between SUAs on the same channel.) For the SUA11-SUA21 pair, all their  
194 spikes originate from  $x_1$ , and hence all SUA21 spikes (i.e., the spikes transferred from  $x_1$  to  $s_2$ ) are found in  
195 SUA11 at the same spike times. Thus, the HSE index for this SUA pair is 1. Note that this is generally the case  
196 for any pair of SUAs that originate from a single ground truth signal and bleed into different channels due to the  
197 cross-talk. On the other hand, the HSE index for the SUA11-SUA22 pair should be as small as expected from  
198 chance coincidences, since these SUAs represent spikes of independent neurons in different ground truth signals.  
199 This is generally the case for any pair of SUAs that originate from different ground truth signals.

200 To summarize, the HSE index between SUAs can only take a value of either 1 or as a small number as expected



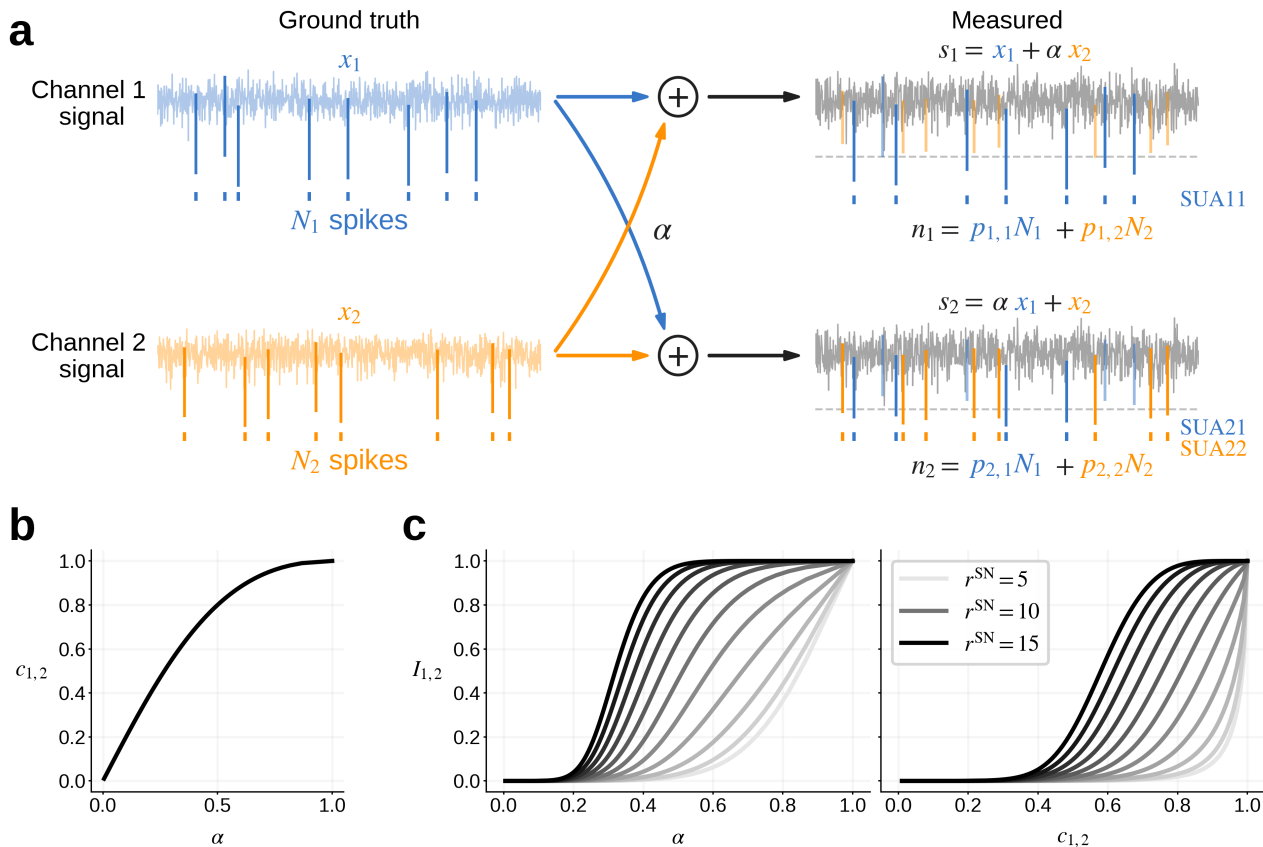

Figure 4: Cross-talk model of synchrofacts. (a) Illustration of the setup for derivation of the synchrofact index. Ground truth signals for channels 1 and 2 are mixed, representing the cross-talk, to yield the signals measured in a pair of channels. Spikes (vertical lines) are introduced to the ground truth signals, and they “bleed” into the measured signal of the other channel via the cross-talk. (b) The correlation  $c_{1,2}$  between the channels plotted against the cross-talk strength  $\alpha$ . (c) The HSE index  $I_{1,2}$  of the channels plotted against the cross-talk strength  $\alpha$  (left) and the correlation  $c_{1,2}$  between the channels (right). Here the signal-to-noise ratios of spikes in  $x_1$  and  $x_2$  are set to be identical  $r_1^{\text{SN}} = r_2^{\text{SN}} = r^{\text{SN}}$ , and varied between 5 and 15 in steps of 1, while keeping the threshold multiplier at  $m = 5$ . The curves for different values of  $r^{\text{SN}}$  are plotted in different shades of gray.

201 from chance coincidences. This conclusion applies to any pair of SUAs as long as spike trains are perfectly sorted  
202 into SUAs in all channels. Thus, any intermediate values of HSE index between these two can only happen when  
203 the index is computed for a MUA pair. If such HSE values were obtained between SUAs, that would indicate that  
204 the spike sorting is not perfect and some SUAs contain spikes bleeding from other channels due to the cross-talk.

## 205 Channel removal for synchrofact mitigation

206 We now consider how we utilize the knowledge from the model to remove synchrofacts from the data. Let us first  
207 consider the case with unsorted MUA spikes. In this case, the model indicates more synchrofacts in channel pairs  
208 with stronger raw signal correlation. Thus, one approach to remove synchrofacts in this case would be to discard  
209 the MUAs of channels strongly correlated with any other channel(s). For such screening of channels, we identify  
210 the highest correlation coefficient for each channel, denoted as  $C_i$  for channel  $i$  and defined as:

$$C_i = \max_{j \neq i}(c_{i,j}), \quad (2)$$

211 where  $c_{i,j}$  denotes the correlation coefficient between the raw signals of channel  $i$  and  $j$ . We then choose a  
212 threshold value on  $C_i$ , such that all channels with  $C_i$  values above this threshold are excluded. Since the model  
213 shows that the HSE index grows rapidly as the correlation coefficient increases beyond 0.4 (see [Cross-talk model](#)  
214 [explains the emergence of synchrofacts in Results](#)), we set the threshold on  $C_i$  at 0.4.

215 To see how the channel-wise highest correlation coefficient  $C_i$  is related to occurrences of HSEs in channel  $i$ ,  
216 we introduce yet another measure evaluating the participation of each channel in HSEs. We term this as the  
217 global HSE index  $I_i$  for channel  $i$ , defined as the ratio of the number of HSEs including channel  $i$  to the number  
218 of all spikes on channel  $i$  (see [Measure of spike synchrony in STAR Methods](#) for the formula). The HSE index  $I_{i,j}$   
219 that we have introduced before for a pair of channels  $i$  and  $j$  is henceforth referred to as pairwise HSE index.  
220 Figure 5a (left) shows the global HSE indices  $I_i$  plotted against their respective highest correlation coefficients  $C_i$   
221 for all channels in macaque Y and L data sets. As expected from the model, the channels with high  $C_i$  values are  
222 indeed also the channels with high  $I_i$  values, while the channels with  $C_i$  below 0.4 show rather small  $I_i$ .

223 As proposed above, we now exclude all channels with  $C_i$  values higher than 0.4 to remove synchrofacts. For  
224 the present data sets this excludes a lot of channels from the analysis. For example, in the case of macaque  
225 Y, more than a half of the channels are excluded (Figure 5b). After discarding MUAs on those channels, the  
226 complexity distribution matches the expectation from chance coincidences (Figure 5c, middle), indicating that  
227 synchrofact HSEs are successfully removed (together with all the spikes on the excluded channels) while keeping  
228 chance HSEs on the remaining channels intact.

229 Among the channels excluded above, there are a considerable number of channels showing low  $I_i$  values  
230 comparable to those of the channels kept for analyses (Figure 5a, middle). According to the model, these would  
231 be the channels with spikes of such small amplitudes that they do not cause synchrofacts (because they do not  
232 cross the threshold even if they bleed into other channels), and not receiving spikes from other channels either. If  
233 this is the case, these channels should be kept in analyses, since they contain only the spikes recorded at their  
234 respective electrodes. This leads to an idea of channel screening by thresholding not on  $C_i$ , but on  $I_i$ . Therefore  
235 we devise a second method to exclude channels as follows: 1) set a threshold for  $C_i$ ; 2) take the highest of the  $I_i$   
236 values for all the channels with  $C_i$  below this threshold; 3) exclude all channels with an  $I_i$  higher than the value  
237 taken in (2). This excludes considerably less channels than the previous method (Figure 5b), but is similar in  
238 results with regard to the complexity distribution (Figure 5c). Thus, regardless of which method we choose, if we  
239 exclude the right channels, we can avoid most of the synchrofacts.

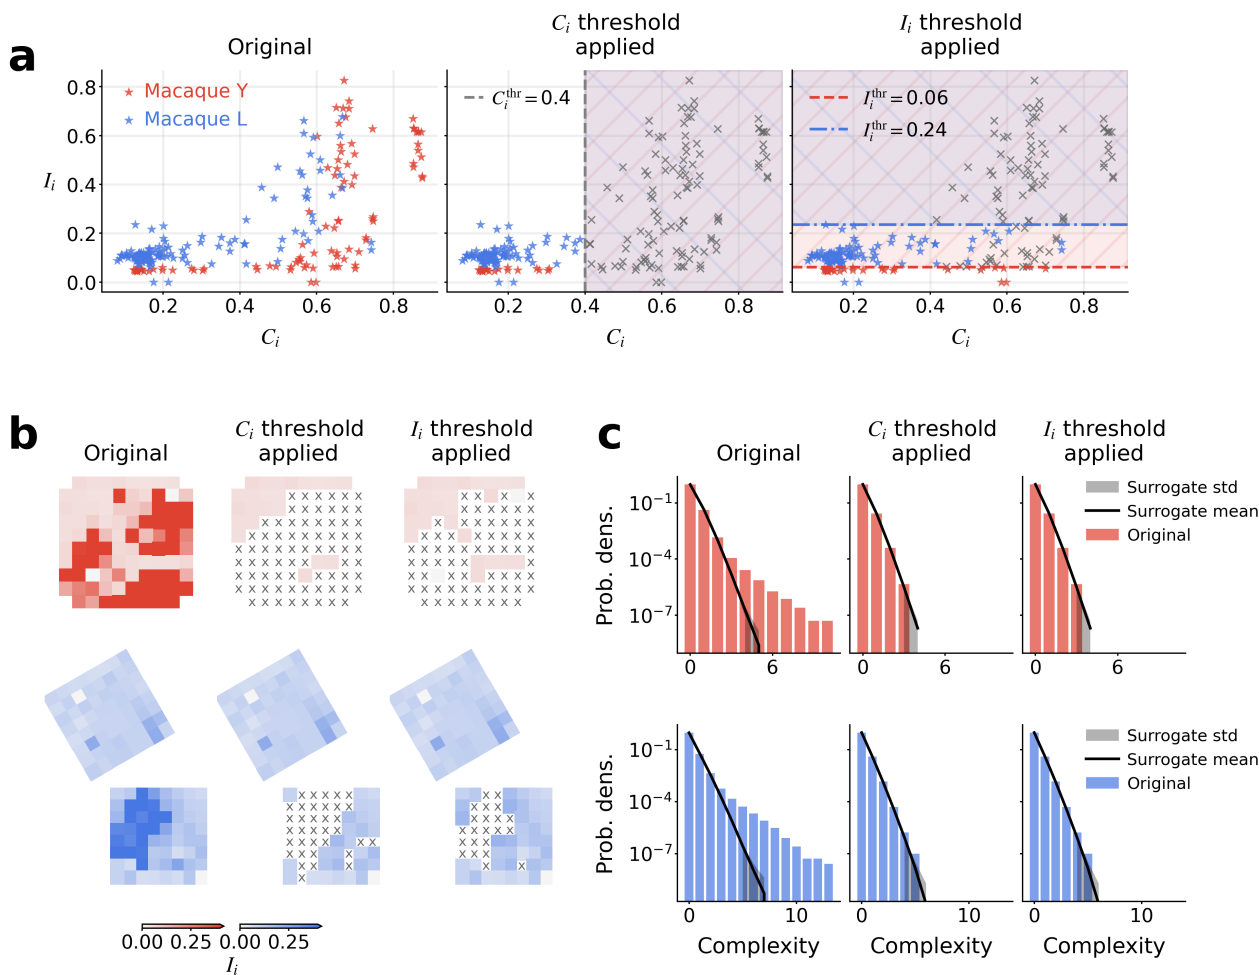

Figure 5: Synchrofact removal based on channel screening. a) The channel-wise highest correlation coefficient  $C_i$  (x-axis) vs. the global HSE index  $I_i$  (y-axis) for channel  $i$ . (Left)  $C_i$  vs.  $I_i$  calculated using all channels. (Middle) Recalculated using only channels with a  $C_i$  lower than 0.4. (Right) Recalculated using only channels with a low  $I_i$ . b) Channels excluded by the proposed methods, shown on the electrode grid of the arrays. Crosses indicate the excluded channels. Colors indicate the  $I_i$  values of the remaining channels. c) Complexity distribution for the channels remaining after the two channel screening methods (middle and right), compared to the original (left, calculated as in [Synchronous spike events are ubiquitous in multi-electrode systems](#)).

## 240 **Synchrofacts can remain in spike sorted data**

241 We then also consider the case with sorted SUA spikes. In this case, the model indicates that, if the spike sorting  
242 is perfect, the HSE index for a SUA pair must be either 1 or a very small value reflecting chance coincidences. If  
243 this is the case, that would make the screening of SUAs for synchrofact removal almost trivial. Here we investigate  
244 whether this really applies to experimental data, using semi-manually sorted data of macaque Y (see **Spike Sorting**  
245 in **STAR Methods** for the spike sorting procedure). One needs to note here that the spike sorter used for this  
246 data set (Plexon Offline Sorter, version 3.3.3) has a functionality to reject cross-channel artifacts, which marks  
247 spike-like events that occur simultaneously on a defined percentage of channels (70%) as “invalidated waveforms”  
248 (see **Spike Sorting** in **STAR Methods**). Thus, HSEs with extremely high complexities, which can be caused by  
249 common noise artifact (an extreme example is shown in Supplementary Figure S4), had already been removed by  
250 the sorter. However, pairwise or group-wise correlations that are expected from cross-talk might go unnoticed,  
251 since spike sorting was done independently per channel and hence the similarity of waveforms and/or spike times  
252 between channels cannot be noticed during the process. Additionally, to ensure the quality of the spike trains  
253 after spike sorting, typically a number of quality metrics are used to filter SUAs. Here we require the waveform  
254 signal-to-noise ratio to be larger than 2.5, and reject SUAs with an average firing rate  $< 1$  Hz.

255 In the following we perform the same analysis as for the MUA data, but now on pairs of SUAs. We compute  
256 the pairwise HSE index  $I_{i,j}$  as before (see **Measure of spike synchrony** in **STAR Methods**), with the subscripts  $i$   
257 and  $j$  here denoting different SUAs rather than channels. Figure 6a shows  $I_{i,j}$  for SUA pairs plotted against the  
258 raw signal correlation coefficient  $c_{i,j}$  for the channels that the respective SUAs belong to. Similar to the results  
259 from channel pairs (c.f. Figure 3e, left), the  $I_{i,j}$  values increase with increasing  $c_{i,j}$  values, with a sharp increase  
260 after  $c_{i,j} \sim 0.4$  taking values between 0 and 1. This spread of  $I_{i,j}$  values between 0 and 1 is contradictory to  
261 the model prediction for the case of perfect spike sorting. Thus, in the SUA pairs with intermediate  $I_{i,j}$  values  
262 between 0 and 1, the respective SUAs should include spikes from different neurons, which were not separated by  
263 the spike sorting.

264 Those SUAs that are contaminated by cross-talk should be removed from analyses, since they do not faithfully  
265 represent the activity of a single neuron and hence would hamper correct interpretation of respective analysis  
266 results. In a similar manner to the channel screening in the previous section (see **Channel removal for synchrofact**  
267 **mitigation** in **Results**), we can consider a screening of SUAs based on the global HSE index computed for SUAs  
268 and the respective channel-wise highest raw signal correlation coefficient. The global HSE index  $I_i$  for SUA  $i$  is  
269 calculated in the same way as for a channel (equation (2)), i.e., now as the ratio of the number of SUA  $i$  spikes  
270 participating in HSEs to the total number of of the SUA  $i$  spikes. Figure 6b shows  $I_i$  for SUAs plotted against  
271 their respective  $C_i$ . One can screen SUAs based on this plot, either by setting a threshold on  $C_i$  or on  $I_i$ . As  
272 shown in the complexity distribution (Figure 6c), we obtain similar results as we got for MUAs: excluding the  
273 worst SUAs removes most of the synchrofacts from the data set. Thus, the proposed method remains valid and  
274 necessary for spike sorted data.

## 275 **Impact of synchrofacts on data analysis**

276 Synchrofacts that remain unnoticed in the data can affect the results and interpretation of various analyses. To  
277 illustrate the danger of undetected synchrofacts, we demonstrate their impact on two types of analyses.

278 First, we show that synchrofacts can significantly alter the estimation of neuronal tuning curves. We simulate  
279 spike trains of motor cortex neurons with a hand movement direction preference (**Georgopoulos et al., 1982**). The  
280 neurons modulate their firing rates in a sinusoidal manner as a function of the direction of the hand movement:  
281 the highest firing rate occurring at the preferred hand movement direction. Here, we consider a pair of neurons  
282 with different preferred directions (PDs), mean firing rates (FRs), and rate-modulation depths (MDs). We  
283 assume that these neurons are recorded in two separate channels, cross-talking with strength  $\alpha$ , such that one  
284 channel (referred to as the source channel) provides artifact spikes to the other channel (referred to as the target

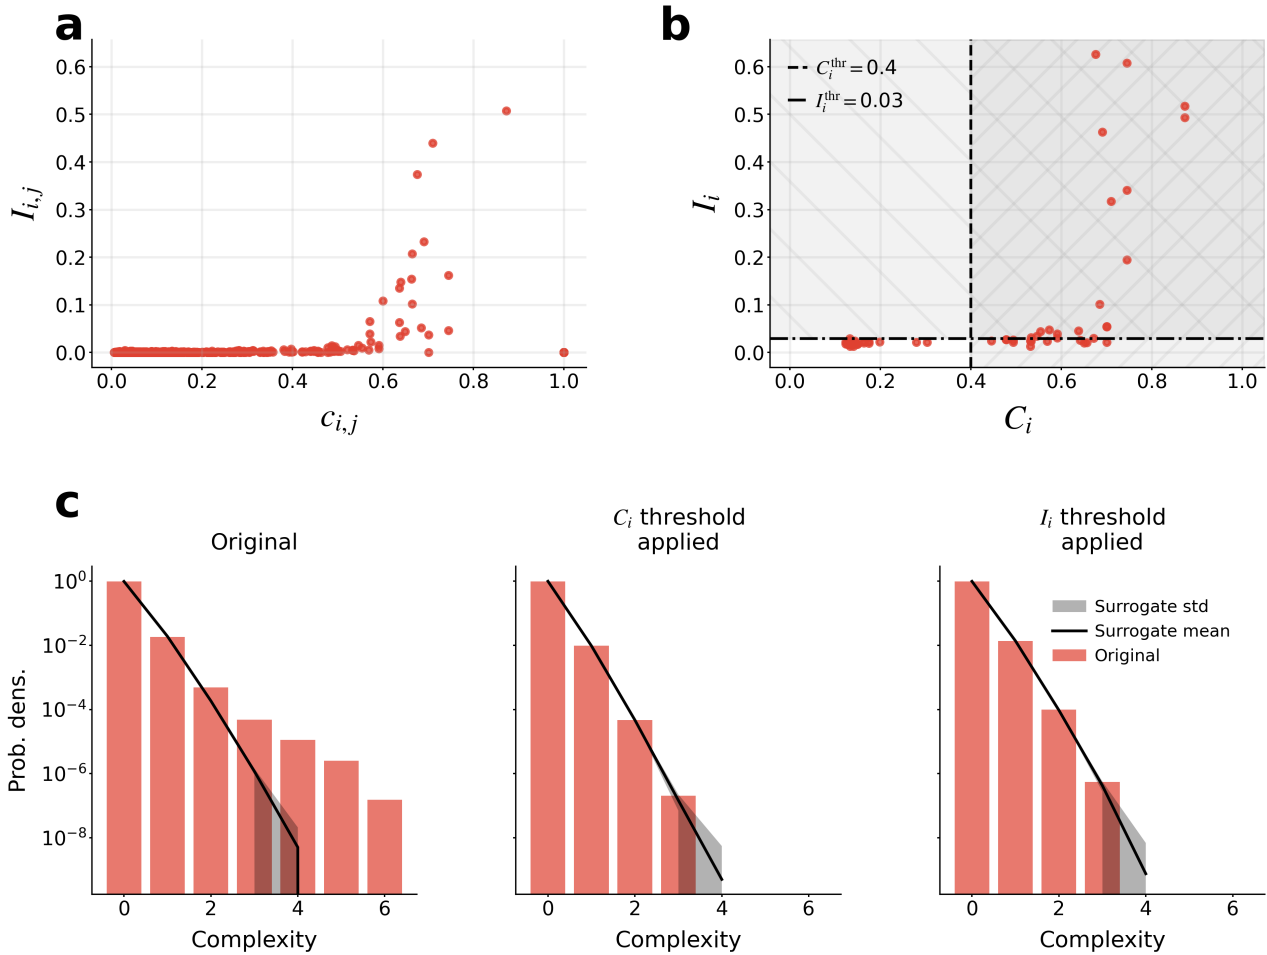

Figure 6: Detection and removal of synchrofacts in spike sorted data from macaque Y. (a) Pairwise HSE index  $I_{i,j}$  for SUA pairs vs. raw signal correlation  $c_{i,j}$  of the respective channel pairs. Note that SUA pairs on an identical channel always yield  $(c_{i,j}, I_{i,j}) = (1, 0)$ . (b) Global HSE index  $I_i$  of SUA  $i$  vs. the channel-wise highest raw signal correlation coefficient  $C_i$  of the corresponding channel. The vertical and horizontal lines indicate the threshold for  $C_i$  and  $I_i$ , respectively, used for removal of SUAs with the proposed method. (c) Complexity distribution computed from the spike sorted data, (left) the original data, (middle) data after SUA removal with the  $C_i$  thresholding method, (right) data after SUA removal based on the  $I_i$  thresholding method.

channel). The neurons in the source and target channel are referred to as the source neuron and the target neuron, respectively.

With this setup, we examine how the tuning curve estimated from the spike train in the target channel is modulated by the artifact spikes from the source channel (Figure 7a). We consider various levels of cross-talk strength  $\alpha$  and their impact on the estimated tuning curve (gray curves in Figure 7a). The three examples in Figure 7a illustrate cases with different combinations of FRs, MDs, and PDs of the two neurons. In Figure 7a (left), the target and source neuron have PDs of  $180^\circ$  (blue curve) and  $90^\circ$  (orange curve), respectively, and both have the same FR and MD. With increasing cross-talk strength, the FR and the MD of the estimated tuning curve gets larger, and in particular, the peak of the estimated tuning curve shifts closer to the source PD. Figure 7a (center) shows a similar example, where the target neuron has a lower FR and smaller MD than the source neuron, while the PDs of both neurons are unchanged. As in the first case, the estimated tuning curve changes with increasing  $\alpha$ , but here it reaches a much higher similarity to the source tuning, due to the higher FR of the source neuron than the target neuron. In Figure 7a (right), the two PDs are opposite: the target at  $180^\circ$  and the source at  $0^\circ$ . Due to the high FR and large MD of the source neuron, the estimated PD becomes more and more similar to the source PD with increasing  $\alpha$ , switching the PD by  $180^\circ$ , and its FR becomes much higher than the original target neuron. From these examples we conclude that any of the PD, FR, and MD of the tuning can be considerably altered by the cross-talk. High firing rate does not protect a neuron from the impact of cross-talk. Thus, cross-talk can fully alter the result from tuning curve estimations, leading to false results.

Another example of the impact of synchronfacts is on the analyses for excess spike synchrony using Unitary Event (UE) analysis, as explained in [Unitary Event analysis in STAR Methods](#). UE analysis ([Grün et al., 2002a,b](#); [Grün & Rotter, 2010](#)) detects excess spike synchrony in a simultaneously recorded pair of spike trains by computing the empirical and expected number of spike coincidences. Here we consider a pair of independent Poisson spike trains (10 spikes/s, 5 s duration) as the ground truth spike signals of a pair of channels, and examine how the cross-talk between these channels affects the result of the UE analysis. According to our model, the empirical number  $n_{\text{emp}}$  of spike coincidences is obtained as  $n_{1,2}$  derived in [Subsection Cross-talk model explains the emergence of synchronfacts](#), while the expected number  $n_{\text{exp}}$  is calculated from the firing rates of the measured spike trains. Figure 7b (left) shows the difference between  $n_{\text{emp}}$  and  $n_{\text{exp}}$  as a function of raw signal correlation  $c_{i,j}$  between the two channels, for a range of the ground truth spike amplitude  $r^{\text{SN}}$ . The larger the  $c_{i,j}$  value (due to the stronger cross-talk), the more spikes bleed across channels (see [Cross-talk model explains the emergence of synchronfacts in Results](#)) and thus more synchronfacts are generated, resulting in the increased difference between  $n_{\text{emp}}$  and  $n_{\text{exp}}$ . This effect is stronger with larger spike amplitude  $r^{\text{SN}}$ . As a consequence, for large  $c_{i,j}$  values, the significance of the difference (Figure 7b, right), expressed here as the surprise (see [Unitary Event analysis in STAR Methods](#)), rises beyond the 5% significance level. The larger the spike amplitude  $r^{\text{SN}}$ , the lower the value of  $c_{i,j}$  at which the surprise crosses the significance threshold. This result shows that, if cross-talk goes unnoticed, the data may be wrongly found to contain significantly excess spike synchrony. This will also happen when the data are binned at larger bin sizes, e.g. 1 ms or more. By excluding channels as proposed here to remove artifacts one can avoid such false positive results.

These are just two examples showing the impact of synchronfacts, but other types of analysis would also be similarly affected and could also produce wrong results in the presence of synchronfacts. To avoid false results, we encourage researchers to make considerable efforts to remove synchronfacts from their data.

## Discussion

We have shown, based on examination of electrophysiological recordings from multiple laboratories, that HSEs in massively parallel spike trains commonly contain synchronfacts, i.e., artifactual extremely precise (at the data sampling resolution) spike synchrony events. Synchronfacts express themselves in the raw signal as nearly identical activity traces, observed in distant electrodes with submillisecond precision, strongly suggesting that they originate

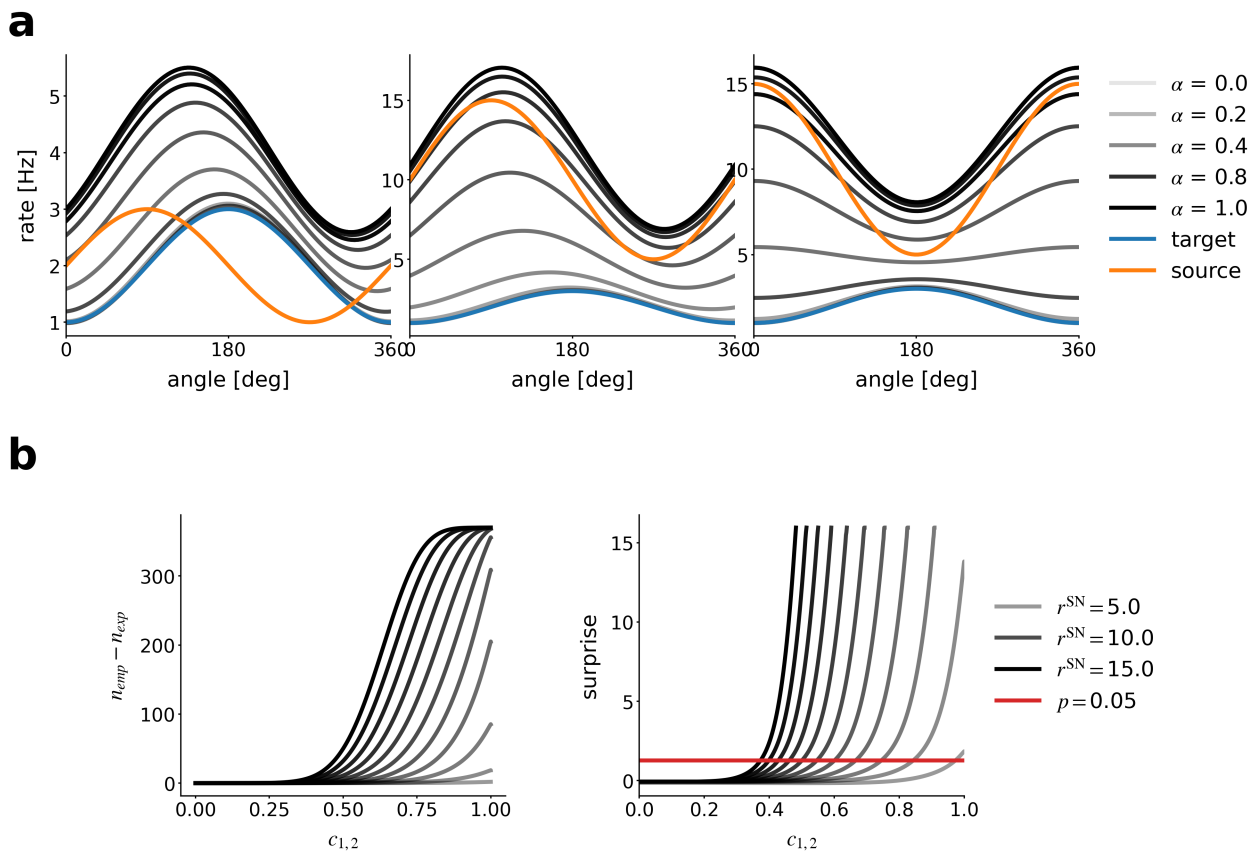

Figure 7: Impact of synchrofacts on data analyses. (a) Impact on neuronal tuning, for three example cases with different combinations of target and source neuron's tuning properties. The tuning curves of the target and source neuron are shown by blue and orange curves, respectively. The tuning curve estimated from the spike trains measured in the target channel is shown in gray, with different shades according to the cross-talk strength  $\alpha$  as indicated in the legend to the right. (b) Impact on Unitary Event analysis. Left: excess spike synchrony, measured as the difference between the empirical and expected number of synchronous spike events, as a function of raw signal correlation. Right: surprise of the excess synchrony as a function of raw signal correlation. The surprise value corresponding to the 5% significance level is indicated by the red horizontal line. In both plots, results for different values of spike amplitude  $r^{SN}$  are shown in different shades of gray.

330 from external noise or cross-talk in the recording hardware. We introduced a new measure, the HSE index ( $I_{i,j}$ ),  
331 to quantify the occurrences of HSEs in each channel pair, and showed its systematic relation to the correlation  
332 coefficient ( $c_{i,j}$ ) of the band-pass filtered raw signals. We also presented a minimal model of cross-talking signals  
333 that explains the observed relation between  $I_{i,j}$  and  $c_{i,j}$ , suggesting that cross-talk is the main source for the  
334 synchrofacts. Based on the observations and the model, we suggested excluding particularly affected channels by  
335 thresholding either  $I_{i,j}$  or  $c_{i,j}$ , which removes nearly all above-chance HSEs. We also showed that spike sorting  
336 alone does not necessarily remove synchrofacts and further filtering is still required. We thus highlighted the  
337 importance of removing these artifacts from neural data, since they could bias analyses and produce misleading  
338 results.

339 As a first step to mitigate artifacts, we tried to identify their physical sources in the experimental recording  
340 setup. We found many short lived artifacts associated with external events such as switching on a light or closing  
341 of a door. Unfortunately, it was not feasible to construct a Faraday cage around the recording setup to avoid  
342 external electromagnetic waves. Cross-talk was another potential source of artifacts, which had been known to  
343 happen between electrode shanks at relatively short distances (Nelson et al., 2017). Since we observed artifacts  
344 at large distances Figure 2, we searched for alternative locations of the cross-talk. Since the placement of the  
345 individual channels in the connector to the head stage does not seem to explain the cross-talk Figure S2, the  
346 circuitry inside the headstage is our primary suspect for cross-talk. There the analog signals from many channels  
347 are simultaneously amplified, filtered and converted to digital; steps known to be very sensitive to cross-talk  
348 (Pérez-Prieto & Delgado-Restituto, 2021; Perez-Prieto et al., 2021). Indeed, in the case of macaque Y, previous  
349 recordings had used the analog signal processing headstage 'Samtec' and 'Patientcable' (Blackrock Microsystems)  
350 (Riehle et al., 2013; Brochier et al., 2018), and after updating it to 'Cereplex E' (Blackrock Microsystems) we  
351 observed far fewer artifacts, likely due to the improved insulation and circuit design. In the case of macaque L  
352 'Cereplex M' (Blackrock Microsystems) was used. Since it was not possible to determine the sources of cross-talk,  
353 we developed the post-hoc artifact removal methods presented in this paper.

354 We have suggested two approaches to remove synchrofacts: applying a threshold on the channel-wise maximum  
355 correlation  $C_i$  of the raw signals, or a threshold on the global HSE index  $I_i$ . Applying the  $C_i$  threshold excludes  
356 slightly more channels than the  $I_i$  threshold. We advise using the  $C_i$  threshold because the remaining channels  
357 better agree with the chance distribution of HSEs. Which approach to take depends on the planned analysis and  
358 its sensibility to precise spike correlations.

359 The complete removal of the HSEs with complexities  $> 1$  on the 1/30 ms timescale can damage the data,  
360 since the lack of chance synchrony (see Figure S1) can be noticed even on longer timescales on the order of several  
361 ms. As a result, potentially existing neuronal spike synchrony may be undetected (Oberste-Frielinghaus, 2022).  
362 A previous study (Torre et al., 2016) removed all HSEs with complexities  $\geq 2$ . This led to an underestimation of  
363 the chance synchrony in the data (see Figure S1). While the study has already revealed a particular organization  
364 of synchronous spike patterns, re-examination of the same data with our new synchrofact removal method might  
365 lead to stronger and clearer results.

366 A previous study (Chen et al., 2022) defined a 'synchrofact participation' (SP) ratio as the number of  
367 synchronous spike events above chance, derived by a bootstrap method on the complexity distribution. The  
368 channels with highest SP were removed iteratively, which re-evaluates the chance levels after removing each  
369 channel. This iterative approach is less strict than ours, in the sense that, when two channels have strong  
370 cross-talk, only removing one of them will avoid above-chance synchrony. However, some of the spikes detected in  
371 the remaining channel could actually originate from the removed channel, and hence the physical location of the  
372 neurons becomes unclear. To avoid such ambiguities we did not employ such an iterative approach here, opting  
373 to remove both contaminated channels.

374 An obvious idea is that false 'spikes' are filtered out by spike sorting, since it involves multiple filtering steps  
375 that would reject spurious spikes. However, following our model, the cross-talk copies spikes into other channels  
376 without major distortions to the waveform, and therefore the copied spikes cannot be readily distinguished from



377 real spikes. In fact, in a former study (not shown here) we tried to discriminate between real spikes and artifact  
378 spikes by cross-correlating spike waveforms, but it was not successful. Here we found that also in spike sorted  
379 data synchrofacts are present, demonstrating that spike sorting does not completely remove artifacts (Figure 6,  
380 Figure S3). However, spike sorted data does show less artifacts than unsorted data, so spike sorting somewhat  
381 reduces the problem.

382 In this work we only showed data recorded with hardware from the same manufacturer, which raises the  
383 question whether recordings using other electrodes, such as high-density Neuropixels probes, may be less affected  
384 by such artifacts. Neuropixels record individual neurons on more than a single recording site, since they are very  
385 close (40  $\mu\text{m}$ ) to each other. This enables spike sorting that takes into consideration more than one signal per  
386 neuron, e.g. by using the Kilosort sorter (Steinmetz et al., 2021; Pachitariu et al., 2023). Nevertheless, we also  
387 found above-chance HSEs in Neuropixels recordings (Jain et al., 2022), highlighting the ubiquity of artifacts and  
388 the importance of adequate postprocessing methods.

389 In summary, we showed that synchrofacts are ubiquitous in multi-electrode recordings and are likely caused by  
390 cross-talk in the recording system. We suggest to compare the complexity distribution of the data with surrogate  
391 data at the data sampling resolution for indications of artifacts. The approach we proposed here to remove  
392 synchrofacts requires access to the original broadband signal at data sampling resolution. This enables us to  
393 relate the pairwise coincidence of spike-like events to the raw signal correlation, and remove the most affected  
394 channels. In our data, cross-talk was the primary source of synchrofacts, and our proposed method effectively  
395 removed the synchrofacts by excluding the most affected channels. If higher-than-chance complexity events  
396 remain after the channel exclusion, artifacts originating from common external noise may be present and should  
397 also be removed by excluding the affected time periods from further analysis. Synchrofacts are ubiquitous in  
398 multi-electrode neural recordings and their presence can affect various analyses. Therefore detection and removal  
399 of synchrofacts is crucial for avoiding false results and ensuring a sound interpretation of the obtained results.

## 400 STAR Methods

### 401 RESOURCE AVAILABILITY

#### 402 Lead contact

403 Further information and requests for resources should be directed to and will be fulfilled by the lead contact,  
404 Jonas Oberste-Frielinghaus (j.oberste-frielinghaus@fz-juelich.de).

#### 405 Materials availability

406 This study did not generate new unique reagents.

#### 407 Data and code availability

408 The electrophysiology data from macaque L were previously published and are publicly accessible (Chen et al.,  
409 2022). The electrophysiology data for macaque Y, together with all processed data for this project (threshold  
410 crossings, cross-correlation, HSE index etc.) have been deposited in a GIN repository and are publicly available  
411 at the time of publication under a Creative Commons Attribution-ShareAlike 4.0 International Public License.  
412 The DOI to the repository is listed in the key resources table. All original code has been deposited at the same  
413 GIN repository and is publicly available as of the date of publication. Any additional information required to  
414 reanalyze the data reported in this paper is available from the lead contact upon request.

## 415 EXPERIMENTAL MODEL AND STUDY PARTICIPANT DETAILS

### 416 Macaques

417 We analyzed the resting state data from two (N=2) rhesus macaques (*Macaca mulatta*), recorded in two different  
418 experimental laboratories. The data from macaque L was collected at the Netherlands Institute for Neuroscience,  
419 and previously published (Chen et al., 2022). The data from macaque Y was collected at the Institut de  
420 Neurosciences de la Timone, with the recording apparatus described by de Haan et al. (2018). At the time of  
421 the array implantation macaque L (male) was 7 years old and weighed  $\sim 11$  kg; and macaque Y (female) was  
422 6 years old and weighed  $\sim 7$  kg. All experimental and surgical procedures for macaque L complied with the  
423 NIH Guide for Care and Use of Laboratory Animals, and were approved by the institutional animal care and  
424 use committee of the Royal Netherlands Academy of Arts and Sciences (approval number AVD-8010020171046).  
425 All experimental and surgical procedures for macaque Y were approved by the local ethical committee (C2EA  
426 71; authorization Apafis#13894-2018030217116218v4) and conformed to the European and French government  
427 regulations.

## 428 METHOD DETAILS

### 429 Data collection

430 Both macaques were recorded using setups based on the Blackrock Microsystems ecosystem.

431 **Macaque L** See Chen et al. (2022) for an in-depth description of this data set. Briefly, electrophysiological  
432 signals originating from the V1 and V4 regions were recorded using a configuration of 1024 channels distributed  
433 across 16 Utah Arrays, each comprising 8x8 electrodes. Sampling was performed at a rate of 30 kHz. The  
434 signal pathway commenced with the passive conduction of neuronal signals from the 1024-channel pedestal to an  
435 Electronic Interface Board (EIB). This EIB was equipped with 32 36-channel Omnetics connectors, facilitating  
436 the interface with eight 128-channel CerePlex M headstages. The CerePlex M headstages applied a 0.3–7500  
437 Hz analog filter at unity gain, refraining from signal amplification. Analog-to-digital conversion (ADC) was  
438 conducted by the CerePlex M, employing a 16-bit resolution with a sensitivity of 250 nV/bit. The digitized signal  
439 was subsequently routed to a 128-channel Digital Hub, with each Digital Hub processing data originating from  
440 one CerePlex M, which in turn was linked to two electrode arrays. The Digital Hub undertook the conversion of  
441 the digital signal into an optic-digital format. This transformed signal was then transmitted via an optic-fiber  
442 cable to a 128-channel Neural Signal Processor (NSP) for subsequent processing and storage. Each Digital Hub  
443 supplied the signal to a single NSP. In total, eight NSPs were employed, with each NSP managing data derived  
444 from two electrode arrays. In the present study, we focused on a single data stream (NSP1) from one session,  
445 which included one array in V1 and one array in V4. These arrays showed many synchrofacts in a previous less  
446 exhaustive analysis (Chen et al., 2022), including events across both arrays, even though they were separated by  
447 the lunate sulcus. Thus, this data stream was particularly useful to demonstrate the non-neural origin of the  
448 synchrofacts. We manually found a large artifact event (see [Common noise artifact example](#)) which we cut out  
449 before the analysis of the data.

450 **Macaque Y** Electrophysiological signals originating from V1, V2, DP, and 7A were recorded with four separate  
451 6x6-electrode Utah Arrays. Additionally, M1/PMd was recorded with a 10x10-electrode Utah Array. Sampling  
452 was performed at a rate of 30 kHz. In contrast to monkey L, the signal pathway commenced with two 128-channel  
453 pedestals (CerePort): One for the four 36-channel arrays and one for the 100-channel array. Each of the pedestals  
454 interfaced with a 128-channel CerePlex E headstage. Notably, the CerePlex E headstages applied a 0.3–7500  
455 Hz analog filter at unity gain, refraining from signal amplification. Analog-to-digital conversion (ADC) was  
456 conducted by the CerePlex E, employing a 16-bit resolution with a sensitivity of 250 nV/bit. The digitized signal

457 was subsequently routed to a 128-channel Digital Hub, with each Digital Hub processing data originating from  
458 one CerePlex E, which in turn was linked to one 100-channel array or four 36-channel arrays. The Digital Hub  
459 undertook the conversion of the digital signal into an optic-digital format. This transformed signal was then  
460 transmitted via an optic-fiber cable to a 128-channel Neural Signal Processor (NSP) for subsequent processing  
461 and storage. Each Digital Hub supplied the signal to a single NSP. In total, two NSPs were employed. In the  
462 present study, we focused on the M1/PMd array from one session, to demonstrate that synchrofacts are not  
463 limited to visual processing areas.

#### 464 **Signal processing and threshold crossings**

465 All offline signal processing steps (except for spike sorting) and data analysis described below were performed  
466 by original custom codes written in the Python programming language and executed in a pipeline defined as a  
467 Snakemake workflow (Mölder et al., 2021). The recorded raw signals were band-pass filtered in the frequency range  
468 of 250 Hz – 7500 Hz (a second order Butterworth filter, as implemented in the `signal_processing.butter()`  
469 function in the Elephant toolbox (Denker et al., 2018)). According to Quiroga (2007), putative spikes were  
470 extracted from the high-pass filtered raw signal of each channel by thresholding it at

$$\text{Threshold} = -5 \cdot \text{median} \left( \frac{|s_i|}{0.6745} \right),$$

471 where  $s_i$  denotes the high-pass filtered raw signal of channel  $i$ . The time of threshold crossing of each putative  
472 spike was registered as the time of that spike. The resulting spike times per channel were taken as the spike train  
473 of the multi-unit activity of that channel.

#### 474 **Spike Sorting**

475 Spike sorting was performed only on the macaque Y data. Details of the sorting procedure are described by  
476 Brochier et al. (2018). The spike waveforms which were extracted and saved during the recording were offline  
477 sorted using the Plexon Offline Sorter (version 3.3.3). We started by merging all online extracted waveforms  
478 back into one pool per channel and marking them as “unsorted waveforms” in the Plexon Offline Sorter. For the  
479 invalidation of cross-channel artifacts (e.g., chewing artifacts), all waveforms that occurred simultaneously on a  
480 defined percentage of channels (70%) were then marked as “invalidated waveforms” in the Plexon Offline Sorter.  
481 Furthermore, a waveform rejection was performed. Thereby all waveforms of abnormally large amplitude and/or  
482 atypical shape on a channel were manually also marked as “invalidated waveforms” in the Plexon Offline Sorter.  
483 The actual spike sorting was then performed on the remaining unsorted waveforms (i.e., those not marked as  
484 invalidated waveforms) individually for each channel. We used different algorithms to split these waveforms into  
485 clusters in a 2- or 3-dimensional principal component (PC) space. The dimensionality of the PC space was chosen  
486 according to the best separation. The main algorithms used were K-Means(-Scan) and Valley Seeking (chosen  
487 according to the best separation). We used a fixed threshold for outliers (a parameter to be determined in the  
488 Plexon Offline Sorter) between 1.8 (K-Means) and 2 (Valley Seeking) to get comparable sorting results. The  
489 spikes of the sorted clusters were then controlled using the inter-spike interval (ISI) distributions and the auto-  
490 and cross-correlation plots. Clusters with unacceptable outcomes (completely or partly overlapping waveforms),  
491 including those with only a few spikes, were left assigned as “unsorted waveforms” in the Plexon Offline Sorter.

#### 492 **Cross-talk model**

493 Electric cross-talk between channels and its influence on the signals are modeled as follows. First, we consider the  
494 “ground truth” signals (i.e., not contaminated by cross-talk)  $x_1(t_i)$  and  $x_2(t_i)$  for channel 1 and 2, respectively,  
495 where  $t_i$  ( $i = 1, 2, 3, \dots$ ) are discrete sampling times. For simplicity, we assume that  $x_1$  and  $x_2$  are time

series of independent Gaussian white noise with the same mean  $E[x_1] = E[x_2] = 0$  and the same variance  $\text{Var}(x_1) = \text{Var}(x_2) = \sigma^2$ .

Next, we model the cross-talk as a linear mixing of these two signals. Concretely, we define the measured signals  $s_1(t_i)$  and  $s_2(t_i)$  for channel 1 and 2, respectively, as:

$$\begin{aligned} s_1 &= x_1 + \alpha x_2 \\ s_2 &= x_2 + \alpha x_1, \end{aligned}$$

where  $\alpha$  is a parameter representing the strength of the cross-talk:  $s_1$  and  $s_2$  are identical when  $\alpha = 1$ , and they are independent when  $\alpha = 0$ . By this construction, both  $s_1$  and  $s_2$  obey a Gaussian distribution with the mean  $E[s_1] = E[s_2] = 0$  and the variance  $\text{Var}(s_1) = \text{Var}(s_2) = (1 + \alpha^2)\sigma^2$ . The Pearson correlation coefficient  $c_{12}$  for the signals  $s_1$  and  $s_2$  is derived as:

$$\begin{aligned} c_{12} &= E[s_1 s_2] / \left( \sqrt{E[s_1^2]} \sqrt{E[s_2^2]} \right) \\ &= E[(x_1 + \alpha x_2)(x_2 + \alpha x_1)] / \left( \sqrt{E[(x_1 + \alpha x_2)^2]} \sqrt{E[(x_2 + \alpha x_1)^2]} \right) \\ &= 2\alpha\sigma^2 / \left( \sqrt{(1 + \alpha^2)\sigma^2} \sqrt{(1 + \alpha^2)\sigma^2} \right) \\ &= 2\alpha / (1 + \alpha^2). \end{aligned}$$

We further introduce spikes to the signals. Here we model spikes in channel 1 by adding a value  $A_1$ , representing the spike amplitude, to  $x_1$  at various, random time points. We parameterize  $A_1$  as  $A = \sigma r_1^{\text{SN}}$ , where  $r_1^{\text{SN}}$  is the signal-to-noise ratio of the spike waveform, such that SUAs with different spike amplitudes are represented by modifying the value of  $r_1^{\text{SN}}$ . The spikes introduced in the ground truth signal  $x_1$  are transferred to the measured signals  $s_1$  and  $s_2$  via the cross-talk. To count those transferred spikes, we extract spikes from  $s_1$  by thresholding it at  $m\sigma_{s_1}$ , where  $\sigma_{s_1} = \sqrt{1 + \alpha^2}\sigma$  is the standard deviation of  $s_1$  and  $m$  is a multiplier determining the threshold in relation to the standard deviation. Assuming that  $N_1$  spikes were introduced to  $x_1$ , we can derive the expected number  $n_{11}$  of the spikes transferred from  $x_1$  and detected in  $s_1$  ( $= x_1 + \sigma r_1^{\text{SN}} + \alpha x_2$  at spike times) as:

$$\begin{aligned} n_{11} &= N_1 \cdot P(x_1 + \sigma r_1^{\text{SN}} + \alpha x_2 > m\sigma_{s_1}) \\ &= N_1 \cdot P(x_1 + \alpha x_2 > (\sqrt{1 + \alpha^2}m - r_1^{\text{SN}})\sigma) \\ &= N_1 \cdot P(\mathcal{N}(0, (1 + \alpha^2)\sigma^2) > (\sqrt{1 + \alpha^2}m - r_1^{\text{SN}})\sigma) \\ &= N_1 \cdot P(\mathcal{N}(0, 1) > m - r_1^{\text{SN}}/\sqrt{1 + \alpha^2}) \\ &= N_1 \cdot \text{erfc}\left(\left(m - r_1^{\text{SN}}/\sqrt{1 + \alpha^2}\right)/\sqrt{2}\right)/2, \end{aligned}$$

where  $\text{erfc}(\cdot)$  is the complementary error function. <sup>1</sup>

Note that the factor  $p_{11} \equiv \text{erfc}\left(\left(m - r_1^{\text{SN}}/\sqrt{1 + \alpha^2}\right)/\sqrt{2}\right)/2$  in front of  $N_1$  in the above expression represents the probability that a spike transferred from the ground truth signal  $x_1$  is detected in the measured signal  $s_1$ . In a similar manner, the probability  $p_{21}$  that a spike originally in  $x_1$  is detected in  $s_2$  is derived as  $p_{21} = \text{erfc}\left(\left(m - \alpha r_1^{\text{SN}}/\sqrt{1 + \alpha^2}\right)/\sqrt{2}\right)/2$ . Furthermore, assuming  $N_2$  spikes in the other ground truth signal  $x_2$ , the probabilities  $p_{12}$  and  $p_{22}$  that those spikes are detected in the measured signals  $s_1$  and  $s_2$ , respectively, are derived as  $p_{12} = \text{erfc}\left(\left(m - \alpha r_2^{\text{SN}}/\sqrt{1 + \alpha^2}\right)/\sqrt{2}\right)/2$  and  $p_{22} = \text{erfc}\left(\left(m - r_2^{\text{SN}}/\sqrt{1 + \alpha^2}\right)/\sqrt{2}\right)/2$ .

With these probability values, the expected numbers  $n_1$  and  $n_2$  of spikes detected in the measured signals  $s_1$

<sup>1</sup>Note that, for simplicity, this formalism does not consider “noise” spikes which arise from the random fluctuations of the background signal that happen to cross the threshold by chance.

520 and  $s_2$ , respectively, are represented as:

$$\begin{aligned}n_1 &= p_{11}N_1 + p_{12}N_2 \\n_2 &= p_{21}N_1 + p_{22}N_2,\end{aligned}$$

521 given the numbers  $N_1$  and  $N_2$  of spikes in the ground truth signals  $x_1$  and  $x_2$ , respectively. Note that the terms  
522  $p_{12}N_2$  and  $p_{21}N_1$  represent the number of spikes transferred from the other channel, and hence these spikes are  
523 detected in the both of the measured signals. Thus, the sum of these terms:  $n_{1,2} = p_{12}N_2 + p_{21}N_1$  represents the  
524 number of synchrofacts in this pair of measured signals. Using this, the HSE index  $I_{1,2}$  between the measured  
525 signals  $s_1$  and  $s_2$  (synchrofact index) is expressed as:

$$I_{1,2} = \begin{cases} n_{1,2}/n_1 = (p_{12}N_2 + p_{21}N_1) / (p_{11}N_1 + p_{12}N_2) & (n_1 \leq n_2) \\ n_{1,2}/n_2 = (p_{12}N_2 + p_{21}N_1) / (p_{21}N_1 + p_{22}N_2) & (n_1 > n_2) \end{cases},$$

526 which takes a value between 0 and 1 depending on the parameters.

## 527 QUANTIFICATION AND STATISTICAL ANALYSIS

### 528 Complexity and estimation of chance levels

529 To study fine-temporal correlation and detect potential synchronous artifacts in parallel spike train data, we first  
530 bin the time axis of the spike trains with a predefined bin width (in the present study we use 1, 0.1, and 1/30 ms  
531 bin widths) and compute the complexity of spiking activity at each bin, i.e., the number of units contributing  
532 spikes to that bin. Then we make a histogram of the complexity values for all the bins throughout the recording,  
533 called complexity distribution (Grün et al., 2008). For easier comparison of the results from different data sets,  
534 the histogram is normalized by dividing the counts of all complexities (including the complexity of zero, i.e., bins  
535 with no spikes) by the total number of bins, such that the sum of the histogram values over all complexities  
536 equals to unity.

537 We compare the empirical distribution to chance levels from independent data, to elucidate if the real data  
538 contains excess spike synchrony. To estimate the complexity distribution of independent data, we use surrogate  
539 data, i.e., modified versions of the original data where spike times are intentionally altered. Stella et al. (2022)  
540 compared a number of surrogate methods, and according to that, we employ here the 'time-shift' method (with  
541 a 30 ms shift width, (Pipa et al., 2008)), by which the spike trains are randomly shifted in time against each  
542 other. Time shifting destroys potential correlations between spike trains, while conserving many other features  
543 of the data such as the inter-spike interval distribution, the firing rate modulations and autocorrelation (Stella  
544 et al., 2022). We generate 200 surrogate spike train data sets, and for each of them we compute the complexity  
545 distribution. The mean and standard deviation of the count are calculated for each complexity, and plotted  
546 together with the empirical complexity distribution for comparison.

### 547 Cross-correlation of high-pass filtered raw signals

548 The correlation  $c_{ij}$  between the raw signals of channel  $i$  and  $j$  is evaluated by the Pearson correlation coefficient  
549 as:

$$c_{i,j} = \frac{\text{Cov}(s_i, s_j)}{\sqrt{\text{Var}(s_i)\text{Var}(s_j)}},$$

550 where  $s_i$  and  $s_j$  represent the high-pass filtered raw signals of channel  $i$  and  $j$ , respectively, obtained as described  
551 in [Signal processing and threshold crossings](#), and  $\text{Var}(s_i)$  and  $\text{Cov}(s_i, s_j)$  represent the variance of  $s_i$  and the  
552 covariance between  $s_i$  and  $s_j$ , respectively.

## 553 Measure of spike synchrony

554 Assume that we have  $n_i$  spikes in channel  $i$  at times  $t_i^p$  ( $1 \leq p \leq n_i$ ). We discretize the time axis in bins of  
555 width  $b$ , which should be small enough to contain at most one spike in a bin, and obtain a set of bin indices  
556  $T_i = \{\tau_i^p | 1 \leq p \leq n_i\}$ , which indicates the positions of the time bins where the spikes are observed (in other  
557 words, the time of the  $p$ -th spike is in the time range  $(\tau_i^p b, (\tau_i^p + 1)b)$ ). The number  $n_{i,j}$  of spike synchrony events  
558 between channels  $i$  and  $j$  is obtained as  $n_{i,j} = |T_i \cap T_j|$ . We define the pairwise HSE index  $I_{i,j}$  as

$$I_{i,j} = \frac{n_{i,j}}{\min(n_i, n_j)},$$

559 which is a measure of the abundance of spike synchrony events between a pair of channels  $i$  and  $j$ . We choose to  
560 divide by the smaller spike count so that the HSE index is independent of the channel order (i.e.,  $I_{i,j} = I_{j,i}$ ) and  
561 also sensitive to HSEs occurring on channels with small number of spikes.

562 In a similar manner, we define the global HSE index  $I_i$  as

$$I_i = \frac{n_{i,\bar{i}}}{n_i},$$

563 where  $n_{i,\bar{i}}$  is defined as  $n_{i,\bar{i}} = |T_i \cap \bigcup_{j \neq i} T_j|$ , which represents the number of spike synchrony events between  
564 channel  $i$  and any other channel. Thus, the global HSE is a measure of the abundance of spike synchrony events  
565 between channel  $i$  and any other channel.

## 566 Unitary Event analysis

567 Unitary Event analysis (Grün et al., 2002a,b; Grün & Rotter, 2010) is a statistical method which enables to  
568 derive excess spike synchrony from a simultaneously recorded pair of spike trains. The method computes the  
569 empirical and the expected number of synchronous spike events and evaluates the statistical significance of the  
570 difference between the two. Suppose that we have two simultaneously recorded spike trains of duration  $T$ . We  
571 bin the time with a bin width of  $b$  and count spikes of each spike train (if multiple spikes are in a bin, the count  
572 is clipped to 1). Then we count the empirical number  $n_{\text{emp}}$  of spike coincidences by counting the number of filled  
573 bins at the same times in both spike trains. Next, we compute the expected number  $n_{\text{exp}}$  of spike coincidences in  
574 the following steps: 1) estimate the spiking probabilities  $p_1$  and  $p_2$  for the two spike trains, by dividing the total  
575 number of spikes in each spike train by the total number of the bins (i.e.,  $T/b$ ). 2) estimate the probability of  
576 spike coincidence in a bin as  $p_1 p_2$ , by assuming independence of the spike times of the two spike trains. 3) obtain  
577 the expected number  $n_{\text{exp}}$  of spike coincidences by multiplying the coincidence probability by the total number  
578 of bins, i.e.,  $n_{\text{exp}} = p_1 p_2 T/b$ . If the spike trains obey the Poisson statistics, the spike coincidence count should  
579 obey a Poisson distribution of the mean  $n_{\text{exp}}$ . Hence, the p-value of the empirical coincidence count  $n_{\text{emp}}$  can be  
580 derived (under the null-hypothesis of Poisson spike trains) as  $p = \sum_{n=n_{\text{emp}}}^{\infty} P_{\text{poisson}}(n|n_{\text{exp}})$ . The significance of  
581 the p-value is quantified by the joint surprise  $S$  defined as  $S = \log_{10}(1-p)/p$ .

## 582 KEY RESOURCES TABLE

| REAGENT or RESOURCE                           | SOURCE                     | IDENTIFIER                                                                                                          |
|-----------------------------------------------|----------------------------|---------------------------------------------------------------------------------------------------------------------|
| <b>Experimental models: Organisms/strains</b> |                            |                                                                                                                     |
| Macaque monkey ( <i>macaca mulatta</i> )      | N/A                        | N/A                                                                                                                 |
| <b>Deposited data</b>                         |                            |                                                                                                                     |
| Raw data macaque L (Session L_RS_090817)      | Chen et al. (2022)         | <a href="https://doi.org/10.12751/g-node.i20kyh">https://doi.org/10.12751/g-node.i20kyh</a>                         |
| Raw data macaque Y                            | This paper                 | Link will be provided upon publication                                                                              |
| <b>Software and algorithms</b>                |                            |                                                                                                                     |
| Python 3                                      | Python Software Foundation | <a href="https://python.org">https://python.org</a>                                                                 |
| Snakemake 7.32.4                              | Open Source                | <a href="https://snakemake.readthedocs.io">https://snakemake.readthedocs.io</a> (Mölder et al., 2021)               |
| Elephant 1.0.0                                | NeuralEnsemble             | <a href="https://elephant.readthedocs.io">https://elephant.readthedocs.io</a> (Denker et al., 2018)                 |
| Custom Code                                   | Open Source                | Link will be provided upon publication                                                                              |
| <b>Other</b>                                  |                            |                                                                                                                     |
| Data acquisition system                       | Blackrock Microsystems LLC | <a href="https://blackrockneurotech.com/products/cerebus">https://blackrockneurotech.com/products/cerebus</a>       |
| Utah Array                                    | Blackrock Microsystems LLC | <a href="https://blackrockneurotech.com/products/utah-array">https://blackrockneurotech.com/products/utah-array</a> |

## 584 Acknowledgements

585 We thank Julia Sprenger, Vahid Rostami and Emiliano Torre for previous work on artifacts. We thank Alexa  
586 Riehle for manually spike sorting the data of macaque Y. We thank Alexa Riehle and Thomas Brochier  
587 for providing the data of monkey Y. This project has received funding partly from the European Union's  
588 Horizon 2020 Framework Programme for Research and Innovation under Specific Grant Agreement No. 945539  
589 (Human Brain Project SGA3), the NRW-network 'iBehave' (grant number: NW21-049) and by the Deutsche  
590 Forschungsgemeinschaft (DFG, German Research Foundation) - 368482240/GRK2416 and the DFG Priority  
591 Program (SPP 2041 "Computational Connectomics") [S.J.van Albada: AL 2041/1-1].

## 592 Author Contributions

593 Conceptualization, J.O., S.G. and J.I.; Methodology, J.O., A.M., S.E., A.K., S.G. and J.I.; Software, J.O., A.M.,  
594 S.E., A.K. and J.I.; Formal Analysis and Investigation, J.O., A.M. and S.E. and J.I.; Visualization, J.O., A.M.  
595 and S.E.; Data Curation, A.M., S.E. and A.K.; Validation, S.E., S.G. and J.I.; Writing – Original Draft, J.O.,  
596 A.M., S.E., A.K., S.G. and J.I.; Writing – Review & Editing, J.O., A.M., S.G. and J.I.; Funding Acquisition,  
597 S.G.; Resources, S.G.; Project Administration, J.O., S.G. and J.I.; Supervision, S.G. and J.I.

## 598 References

- 599 Barban, F., Chiappalone, M., Bonassi, G., Mantini, D., & Semprini, M. (2021). Yet another artefact rejection  
600 study: an exploration of cleaning methods for biological and neuromodulatory noise. *Journal of Neural*  
601 *Engineering* 18, 0460c2.
- 602 Bell, A. J. & Sejnowski, T. J. (1995). An Information-Maximization Approach to Blind Separation and Blind  
603 Deconvolution. *Neural Computation* 7, 1129–1159.
- 604 Blot, A. & Barbour, B. (2014). Ultra-rapid axon-axon ephaptic inhibition of cerebellar Purkinje cells by the  
605 pinceau. *Nature Neuroscience* 17, 289–295.
- 606 Brochier, T., Zehl, L., Hao, Y., Duret, M., Sprenger, J., Denker, M., Grün, S., & Riehle, A. (2018). Massively  
607 parallel recordings in macaque motor cortex during an instructed delayed reach-to-grasp task. *Scientific Data*  
608 5, 180055.

- 609 Butts, D. A., Weng, C., Jin, J., Yeh, C.-I., Lesica, N. A., Alonso, J.-M., & Stanley, G. B. (2007). Temporal  
610 precision in the neural code and the timescales of natural vision. *Nature* *449*, 92–95.
- 611 Chen, X., Morales-Gregorio, A., Sprenger, J., Kleinjohann, A., Sridhar, S., van Albada, S. J., Grün, S., &  
612 Roelfsema, P. R. (2022). 1024-channel electrophysiological recordings in macaque V1 and V4 during resting  
613 state. *Scientific Data* *9*, 77.
- 614 Churchland, M. M., Yu, B. M., Ryu, S. I., Santhanam, G., & Shenoy, K. V. (2006). Neural variability in premotor  
615 cortex provides a signature of motor preparation. *Journal of Neuroscience* *26*, 3697–3712.
- 616 Dann, B., Michaels, J. A., Schaffelhofer, S., & Scherberger, H. (2016). Uniting functional network topology and  
617 oscillations in the fronto-parietal single unit network of behaving primates. *eLife* *5*, e15719.
- 618 de Haan, M. J., Brochier, T., Grün, S., Riehle, A., & Barthélemy, F. V. (2018). Real-time visuomotor behavior  
619 and electrophysiology recording setup for use with humans and monkeys. *Journal of Neurophysiology* *120*,  
620 539–552.
- 621 Dehnen, G., Kehl, M. S., Darcher, A., Müller, T. T., Macke, J. H., Borger, V., Surges, R., & Mormann, F. (2021).  
622 Duplicate Detection of Spike Events: A Relevant Problem in Human Single-Unit Recordings. *Brain Sciences*  
623 *11*, 761.
- 624 Delorme, A., Sejnowski, T., & Makeig, S. (2007). Enhanced detection of artifacts in EEG data using higher-order  
625 statistics and independent component analysis. *Neuroimage* *34*, 1443–1449.
- 626 Denker, M., Yegenoglu, A., & Grün, S. (2018). Collaborative HPC-enabled workflows on the HBP Collaboratory  
627 using the Elephant framework. In *Neuroinformatics 2018*, p. P19.
- 628 Fabietti, M., Mahmud, M., Lotfi, A., Aversa, A., Gugganmos, D., Nudo, R., & Chiappalone, M. (2020). Neural  
629 Network-based Artifact Detection in Local Field Potentials Recorded from Chronically Implanted Neural  
630 Probes. In *2020 International Joint Conference on Neural Networks (IJCNN)*, pp. 1–8. (Glasgow, United  
631 Kingdom: IEEE).
- 632 Farina, D., Merletti, R., Indino, B., & Graven-Nielsen, T. (2004). Surface EMG Crosstalk Evaluated from  
633 Experimental Recordings and Simulated Signals: Reflections on Crosstalk Interpretation, Quantification and  
634 Reduction. *Methods of Information in Medicine* *43*, 30–35.
- 635 Georgopoulos, A., Kalaska, J., Caminiti, R., & Massey, J. (1982). On the relations between the direction of  
636 two-dimensional arm movements and cell discharge in primate motor cortex. *Journal of Neuroscience* *11*,  
637 1527–1537.
- 638 Grün, S. (2009). Data-driven significance estimation of precise spike correlation. *Journal of Neurophysiology* *101*,  
639 1126–1140. (invited review).
- 640 Grün, S., Abeles, M., & Diesmann, M. (2008). Impact of higher-order correlations on coincidence distributions  
641 of massively parallel data. In *Lecture Notes in Computer Science, 'Dynamic Brain - from Neural Spikes to*  
642 *Behaviors'*, vol. 5286.
- 643 Grün, S., Diesmann, M., & Aertsen, A. (2002a). Unitary events in multiple single-neuron spiking activity: I.  
644 detection and significance. *Neural Computation* *14*, 43–80.
- 645 Grün, S., Diesmann, M., & Aertsen, A. (2002b). Unitary events in multiple single-neuron spiking activity: II.  
646 nonstationary data. *Neural Computation* *14*, 81–119.
- 647 Grün, S., Diesmann, M., Grammont, F., Riehle, A., & Aertsen, A. (1999). Detecting unitary events without  
648 discretization of time. *Journal of Neuroscience Methods* *94*, 67–79.



- 649 Grün, S. & Rotter, S. eds. (2010). *Analysis of Parallel Spike Trains*. (Springer).
- 650 Harris, K. D., Quiroga, R. Q., Freeman, J., & Smith, S. L. (2016). Improving data quality in neuronal population  
651 recordings. *Nature Neuroscience* *19*, 1165–1174.
- 652 Hatsopoulos, N., Ojakangas, C., Paninski, L., & Donoghue, J. (1998). Information about movement direction  
653 obtained from synchronous activity of motor cortical neurons. *Proceedings of the National Academy of Sciences*  
654 of the United States of America *26*, 15706–15711.
- 655 Henze, D., Borhegyi, Z., Csicsvari, J. and Mamiya, A., Harris, K., & Buzsaki, G. (2000). Intracellular features  
656 predicted by extracellular recordings in the hippocampus in vivo. *Journal of Neurophysiology* *1*, 390–400.
- 657 Hotelling, H. (1936). Relations between two sets of variates. *Biometrika* *28*, 321–377.
- 658 Islam, M. K., Rastegarnia, A., Nguyen, A. T., & Yang, Z. (2014). Artifact characterization and removal for in  
659 vivo neural recording. *Journal of Neuroscience Methods* *226*, 110–123.
- 660 Jain, A., Kleinjohann, A., Graff, S., Doerenkamp, K., Kampa, B., Grün, S., & Musall, S. (2022). An adaptive  
661 analysis pipeline for automated denoising and evaluation of high-density electrophysiological recordings. 17  
662 Mar 2022 - 20 Mar 2022, Lisbon(Portugal).
- 663 Jun, J. J., Steinmetz, N. A., Siegle, J. H., Denman, D. J., Bauza, M., Barbarits, B., Lee, A. K., Anastassiou,  
664 C. A., Andrei, A., Aydın, Ç., et al. (2017). Fully integrated silicon probes for high-density recording of neural  
665 activity. *Nature* *551*, 232–236.
- 666 Kilner, J. M., Baker, S. N., & Lemon, R. N. (2002). A novel algorithm to remove electrical cross-talk between  
667 surface EMG recordings and its application to the measurement of short-term synchronisation in humans.  
668 *Journal of Physiology* *538*, 919–930.
- 669 Koh, T. J. & Grabiner, M. D. (1993). Evaluation of methods to minimize cross talk in surface electromyography.  
670 *Journal of Biomechanics* *26*, 151–157.
- 671 König, P., Engel, A. K., Roelfsema, P. R., & Singer, W. (1995). How precise is neuronal synchronization. *Neural*  
672 *Computation* *7*, 469–485.
- 673 Ludwig, K. A., Miriani, R. M., Langhals, N. B., Joseph, M. D., Anderson, D. J., & Kipke, D. R. (2009). Using a  
674 Common Average Reference to Improve Cortical Neuron Recordings From Microelectrode Arrays. *Journal of*  
675 *Neurophysiology* *101*, 1679–1689.
- 676 Morales-Gregorio, A., Kurth, A. C., Ito, J., Kleinjohann, A., Barthélemy, F. V., Brochier, T., Grün, S., & van  
677 Albada, S. J. (2023). Neural manifolds in V1 change with top-down signals from V4 targeting the foveal region.  
678 *BioRxiv* pp. 2023–06.
- 679 Mumtaz, W., Rasheed, S., & Irfan, A. (2021). Review of challenges associated with the EEG artifact removal  
680 methods. *Biomedical Signal Processing and Control* *68*, 102741.
- 681 Musial, P., Baker, S., Gerstein, G., King, E., & Keating, J. (2002). Signal-to-noise ratio improvement in multiple  
682 electrode recording. *Journal of Neuroscience Methods* *1*, 29–43.
- 683 Mölder, F., Jablonski, K., Letcher, B., Hall, M., Tomkins-Tinch, C., Sochat, V., Forster, J., Lee, S., Twardziok,  
684 S., Kanitz, A., et al. (2021). Sustainable data analysis with snakemake [version 1; peer review: 1 approved, 1  
685 approved with reservations]. *F1000Research* *10*.
- 686 Nagaoka, T., Walker, D., Seaba, P. J., & Yamada, T. (1992). “Cross-talk” in recording evoked potentials.  
687 *Electroencephalography and Clinical Neurophysiology/Evoked Potentials Section* *84*, 473–476.

- 688 Nelson, M. J., Valtcheva, S., & Venance, L. (2017). Magnitude and behavior of cross-talk effects in multichannel  
689 electrophysiology experiments. *Journal of Neurophysiology* *118*, 574–594.
- 690 Oberste-Frielinghaus, J. (2022). Baseline and Functional Correlations in Vision for Action Experiment. Master's  
691 thesis, RWTH Aachen University.
- 692 Pachitariu, M., Sridhar, S., & Stringer, C. (2023). Solving the spike sorting problem with kilosort. *BioRxiv* .
- 693 Perez-Prieto, N., Rodriguez-Vazquez, A., Alvarez-Dolado, M., & Delgado-Restituto, M. (2021). A 32-Channel  
694 Time-Multiplexed Artifact-Aware Neural Recording System. *IEEE Transactions on Biomedical Circuits and*  
695 *Systems* *15*, 960–977.
- 696 Pipa, G., Wheeler, D. W., Singer, W., & Nikolic, D. (2008). Neuroxidence: reliable and efficient analysis of an  
697 excess or deficiency of joint-spike events. *Journal of Neuroscience Methods* *25*, 64–88.
- 698 Pérez-Prieto, N. & Delgado-Restituto, M. (2021). Recording Strategies for High Channel Count, Densely Spaced  
699 Microelectrode Arrays. *Frontiers in Neuroscience* *15*, 681085.
- 700 Quiroga, R. Q. (2007). Spike sorting. *Scholarpedia Journal* *2*, 3583.
- 701 Quiroga, R. Q., Nadasdy, Z., & Ben-Shaul, Y. (2004). Unsupervised spike detection and sorting with wavelets  
702 and superparamagnetic clustering. *Neural Computation* *16*, 1661–87.
- 703 Rey, H. G., Pedreira, C., & Quiroga, R. (2015). Past, present and future of spike sorting techniques. *Brain*  
704 *Research Bulletin* *119*, 106–117.
- 705 Riehle, A., Grün, S., Diesmann, M., & Aertsen, A. (1997). Spike synchronization and rate modulation differentially  
706 involved in motor cortical function. *Science* *278*, 1950–1953.
- 707 Riehle, A., Wirtssohn, S., Grün, S., & Brochier, T. (2013). Mapping the spatio-temporal structure of motor  
708 cortical LFP and spiking activities during reach-to-grasp movements. *Frontiers in Neural Circuits* *7*, 48.
- 709 Rong, F. & Contreras-Vidal, J. L. (2006). Magnetoencephalographic artifact identification and automatic removal  
710 based on independent component analysis and categorization approaches. *Journal of Neuroscience Methods*  
711 *157*, 337–354.
- 712 Semedo, J. D., Jasper, A. I., Zandvakili, A., Krishna, A., Aschner, A., Machens, C. K., Kohn, A., & Yu, B. M.  
713 (2022). Feedforward and feedback interactions between visual cortical areas use different population activity  
714 patterns. *Nature Communications* *13*, 1099.
- 715 Shackman, A. J., McMennamin, B. W., Slagter, H. A., Maxwell, J. S., Greischar, L. L., & Davidson, R. J. (2009).  
716 Electromyogenic Artifacts and Electroencephalographic Inferences. *Brain Topography* *22*, 7–12.
- 717 Snyder, A. C., Yu, B. M., & Smith, M. A. (2021). A Stable Population Code for Attention in Prefrontal Cortex  
718 Leads a Dynamic Attention Code in Visual Cortex. *Journal of Neuroscience* *41*, 9163–9176.
- 719 Steinmetz, N. A., Aydin, C., Lebedeva, A., Okun, M., Pachitariu, M., Bauza, M., Beau, M., Bhagat, J., Böhm,  
720 C., Broux, M., et al. (2021). Neuropixels 2.0: A miniaturized high-density probe for stable, long-term brain  
721 recordings. *Science* *372*, eabf4588.
- 722 Stella, A., Bouss, P., Palm, G., & Grün, S. (2022). Comparing surrogates to evaluate precisely timed higher-order  
723 spike correlations. *eNeuro* *9*, ENEURO.0505–21.2022.
- 724 Torre, E., Quaglio, P., Denker, M., Brochier, T., Riehle, A., & Grün, S. (2016). Synchronous spike patterns in  
725 macaque motor cortex during an instructed-delay reach-to-grasp task. *Journal of Neuroscience* *36*, 8329–8340.

- 726 Wim De Clercq, Vergult, A., Vanrumste, B., Van Paesschen, W., & Van Huffel, S. (2006). Canonical Correlation  
727 Analysis Applied to Remove Muscle Artifacts From the Electroencephalogram. *IEEE Transactions on Biomedical*  
728 *Engineering* 53, 2583–2587.
- 729 Yu, B. M., Cunningham, J. P., Santhanam, G., Ryu, S. I., Shenoy, K. V., & Sahani, M. (2009). Gaussian-  
730 Process Factor Analysis for Low-Dimensional Single-Trial Analysis of Neural Population Activity. *Journal of*  
731 *Neurophysiology* 102, 614–635.

## 732 Supplementary Material

### 733 Complexity distribution after removing all synchronous spikes

734 We examine the effect of the naive approach to remove all HSEs from the spike trains as proposed by Torre et al.  
735 (2016). Therefore we calculate the complexity distribution for the data after all spikes in HSEs are removed  
736 and compare this to the surrogates obtained from the data after the removal of the spikes. As to be expected,  
737 the distribution for the original data after the removal only contains entries for complexities of zero and one.  
738 However in the surrogates we find complexity up to six in the surrogate data, concluding that the data after  
739 removal significantly lacks synchrony since a certain amount of HSEs is expected. This shows that the naive  
740 approach should not be taken to remove synchrofacts.

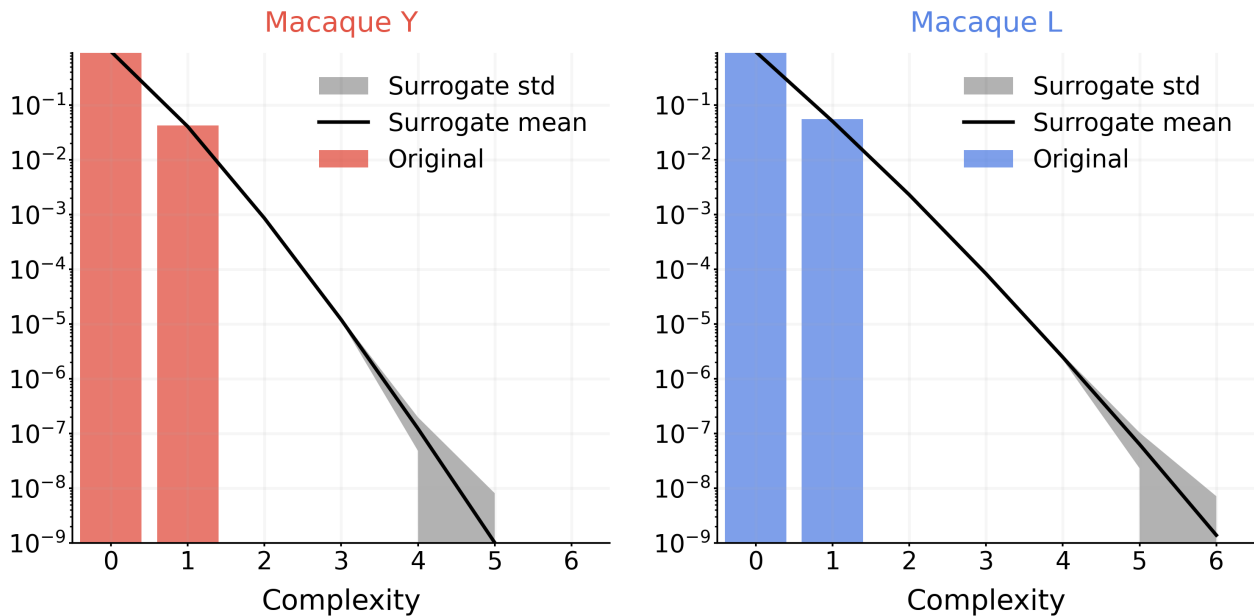

Figure S1: Complexity distribution after removing all synchronous spikes, Complexity distribution of the original data (colored bars), and the mean and standard deviation (line and shade, respectively) for the complexity distribution of the respective surrogates,  $\frac{1}{30}$  ms bin size.

## 741 Connector mapping versus array mapping

742 In search for causes of strong raw signal correlations between channels, we examine the spatial distribution of the  
743 channels showing strong correlations on two spatial maps of channels: one on the level of the electrode arrays  
744 and the other the head stage connectors. In the case of macaque Y, the relative positions of channels are almost  
745 identical between the two maps, and hence we cannot conclude on which level the cross-talk is localized. In the  
746 case of macaque L, however, the spatial distribution of highly correlated channels is largely different between the  
747 array mapping and the connector mapping, indicating that the cause of the high correlations is localized on the  
748 level of the electrode arrays.

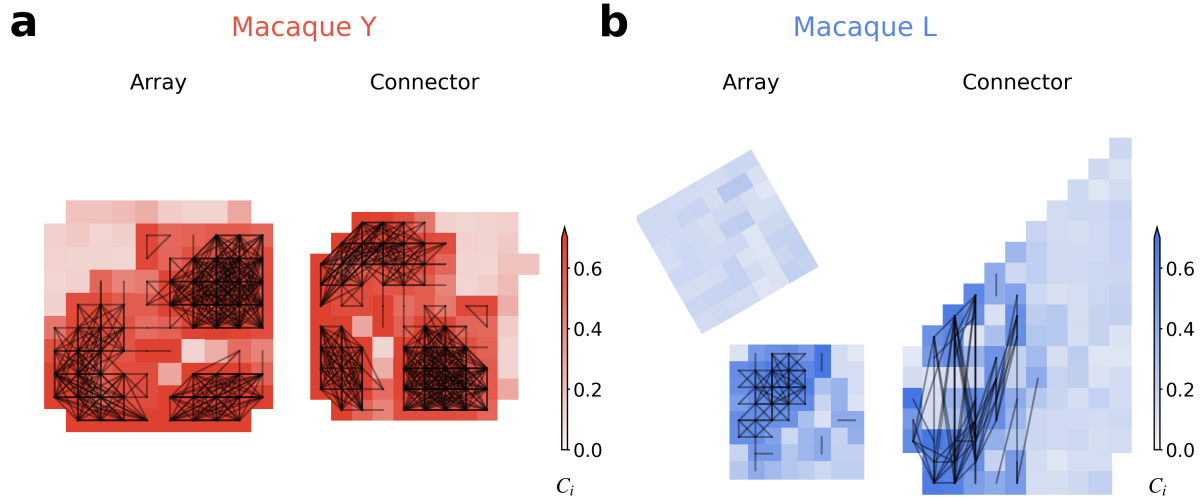

Figure S2: Comparison of spatial distribution of maximal raw signal correlation per channel ( $C_i$ ) on the electrode array layout (left) and the headstage connector layout (right) for (a) macaque Y and (b) macaque L. Black lines connect electrode pairs with pairwise raw signal correlations  $c_{i,j} > 0.4$ .

## 749 Comparison between empirical and surrogate HSE index

750 To examine how large the HSE indices obtained from real data are in comparison to those from independent  
 751 spike trains with matched firing rates, we plot the empirical pairwise HSE indices in the macaque Y data against  
 752 the respective surrogate HSE indices obtained from time shifted surrogate data (Figure S3a; the mean over 200  
 753 surrogates is taken for each channel pair). The majority of channel pairs show larger empirical HSE index values  
 754 than the respective surrogate values. This could reflect a bias originating from the definition of the HSE index  
 755 that synchrofacts in channels with small numbers of spikes can be over-represented in the index. Hence, we  
 756 next focus only on channels with firing rates greater than 1 spikes/s (Figure S3b). While a certain amount of  
 757 channel pairs with large empirical HSE indices were screened out by this conditioning, we still see a considerable  
 758 number of channels with extremely large empirical HSE indices compared to the surrogates, which are most likely  
 759 the ones suffering from the cross-talk. After applying our proposed channel exclusion methods (Figure S3c and  
 760 d), those channel pairs are screened out and the remaining ones show empirical HSE indices comparable to the  
 761 surrogate indices, meaning that the remaining channels have as many HSEs as in independent spike trains. The  
 762 mean of the empirical HSE indices over channel pairs is still slightly higher than the mean of the surrogate HSE  
 763 indices, which is likely due to other causes of synchrofact than cross-talk. One of such causes is common external  
 764 noise across channels. Spike-like events generated by such noise typically show waveforms dissimilar to real spike  
 765 waveforms, and hence can be effectively excluded by spike sorting. To check whether that is actually the case,  
 766 we plot the HSE indices for SUA pairs in the same manner as before (Figure S3e-g). Again, after applying our  
 767 proposed methods, SUA pairs show only as many HSEs as in the surrogates, and in this case of SUA pairs, the  
 768 mean empirical HSE index is much more consistent with the mean surrogate HSE index than in the case of  
 769 channel pairs.

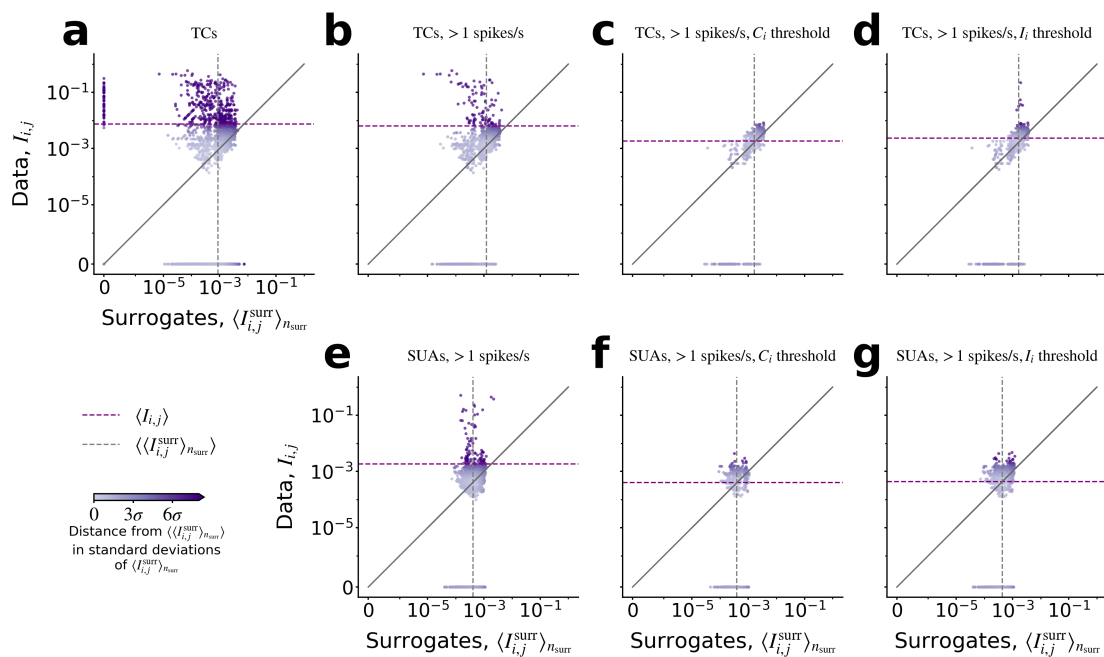

Figure S3: Comparison of the pairwise HSE index  $I_{i,j}$  in the experimental data and the average of the corresponding surrogate data  $\langle I_{i,j}^{\text{SURR}} \rangle_{n_{\text{SURR}}}$ , each point corresponding to one channel pair. Mean of each variable is shown with a dashed line. The diagonal line indicates the identity between the two measures. The color shading represents the difference from the theoretically random data, at the point where the mean surrogate index  $\langle \langle I_{i,j}^{\text{SURR}} \rangle_{n_{\text{SURR}}} \rangle$  crosses the diagonal; large deviations from this point are indicative of above-chance HSEs. The different panels show the results for the same session based on (a-d) all threshold crossings (TCs), or (e-g) spike sorted single units (SUAs). The different columns show different removal methods: (b, e) threshold on the firing rate, (c, f) threshold on firing rate and maximum cross-correlation  $C_i$ , and (d, g) threshold on firing rate and global HSE index  $I_i$ .

## 770 Common noise artifact example

771 The data of macaque L contained highly synchronized activity in the data lasting for about 500 ms (see Figure S4,  
772 bottom), which is likely due to strong common noise contaminating all the channels equally. Such common  
773 noise can enter the system via the reference electrode. We identified this burst of synchronous spike activity as  
774 artifacts since these synchronous spikes also still exist on the sampling rate resolution (top). It introduced in the  
775 complexity distribution a huge amount of events with complexities up to 35. Therefore, we removed this piece of  
776 data (1000 ms) before any further analysis. We did not detect such events in the data from macaque Y.

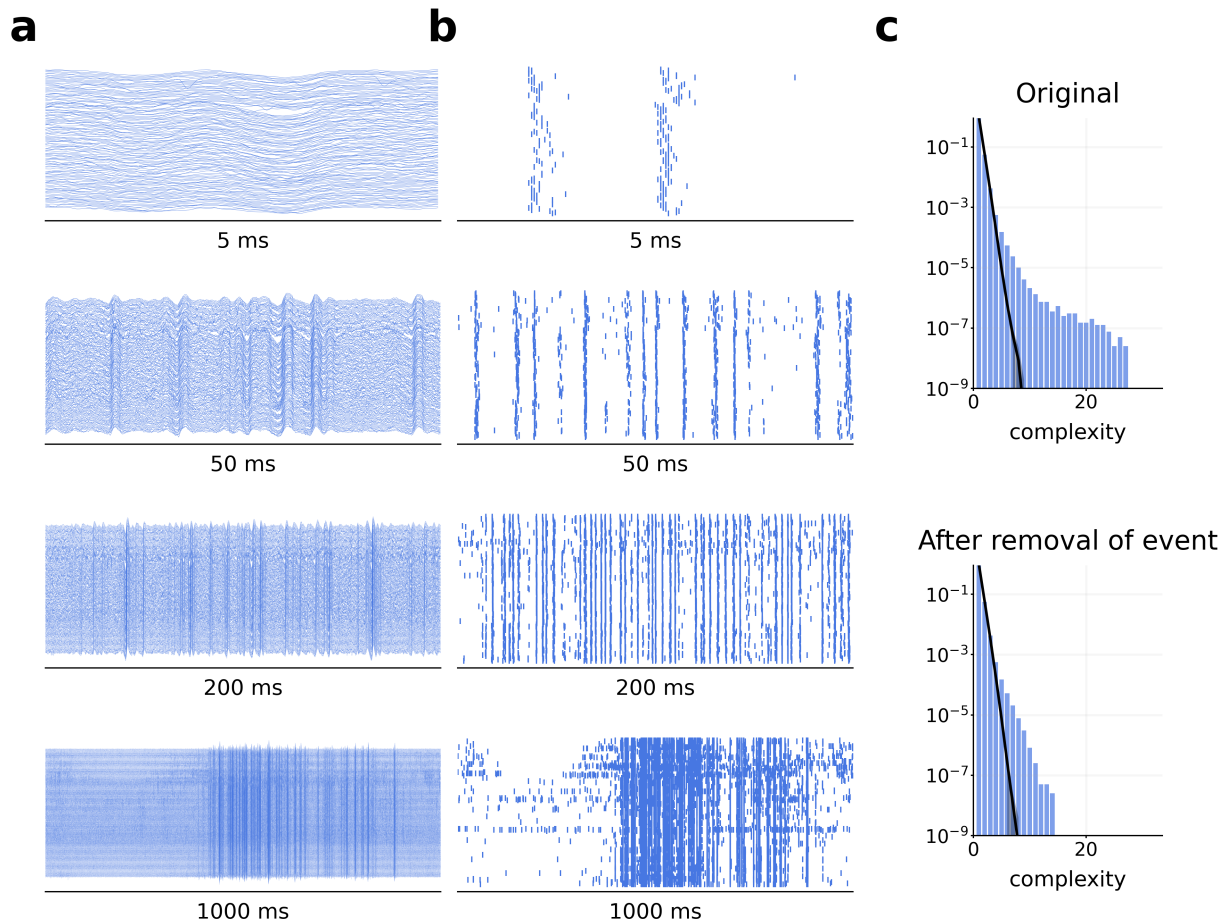

Figure S4: Burst artifact in monkey L. The left column, bottom shows the whole burst artifact, that expresses a lot of synchrofacts (on sampling rate of 30 kHz) one after the other over a period of about 500 ms. The plots above show higher resolutions of that event, and on the top the total display shows piece of the data lasting 5 ms. On the right top, the complexity distribution of the whole data set is shown, below after the complete removal of this burst event, which still contains artifacts. But as shown in Figure 5 these can be completely removed by our removal procedure.
